# The microbiome of an amphibious plant shifts dramatically across the host life cycle.

1 *Jorge A Mandussi Montiel-Molina<sup>1</sup>, Jason P Sexton<sup>1</sup>, J Michael Beman<sup>1</sup>, A Carolin Frank<sup>1</sup>*

2 <sup>1</sup>Department of Life and Environmental Sciences, University of California Merced, CA, USA

3 \* **Correspondence:**

4 Montiel-Molinia JAM

5 [jmontielmolina@ucmerced.edu](mailto:jmontielmolina@ucmerced.edu)

6 **Keywords: vernal pools, microbial symbionts, bacteria, environmental microbiology**

7 **Words: 7600, Tables: 5, Figures: 7**

## 8 **Abstract**

9 Interactions between plants and their associated microbiomes are thought to enhance the capacity of  
10 the host plant to overcome extreme conditions, yet the significance of microbially mediated stress  
11 tolerance in most plant species and ecosystems remains unknown. For the first time, we examined the  
12 microbiome of the amphibious plant *Eryngium castrense* (Apiaceae) inhabiting Mediterranean  
13 climate ephemeral wetlands in California. *Eryngium castrense* has the capacity to survive as both an  
14 aquatic and terrestrial plant, thereby living under contrasting extremes of water stress. Whether plant-  
15 associated microbial communities are also affected by such changes, and what ecological role they  
16 play while inhabiting amphibious plants, is an underexplored topic of plant-microbial interactions in  
17 natural and artificial systems. We amplified and sequenced 16S rRNA genes from bacteria and  
18 archaea to examine microbial communities associated with roots and shoots over the plants' full life  
19 cycle. We observed that the microbiome changes from the aquatic stage to the terrestrial stage, and  
20 that roots and shoots represent distinct habitats within the plant host ecosystem. When compared with  
21 soil and water column samples, plant samples retained a unique, differentiated core microbiome.  
22 Taxa located in the roots during the terrestrial stage were linked with potential functions such as  
23 nitrogen acquisition, sulfur assimilation, and resistance to heavy metals, whereas aquatic roots held  
24 potential phythoparasites. Overall, our results provide new insights into symbiotic relationships in  
25 plants subject to stress-related to water saturation and deficiency.

## 26 **1 Introduction**

27 Symbiosis with microbes can improve plant health and habitat adaptation in natural and artificial  
28 environments, with several plant traits co-regulated by the associated microbiome and the plant's  
29 genome (Rodriguez, et al 2009; Morelli, et al 2020). Research focusing on symbiotic associations can  
30 also enhance ecological theory and may even lead to the development of new biotechnology  
31 (Redman et al, 2022). Among symbionts, microbial inhabitants of the rhizosphere and phyllosphere  
32 are considered epiphytes, whereas microbes residing within plant tissues (the endosphere) are  
33 considered endophytes. These different types of symbionts can also occupy different within-plant  
34 habitats (compartments)—such as roots, shoots, and leaves—establishing beneficial associations with  
35 their host plants (Carrell & Frank, 2014; Fan, et al 2020). Selection imposed by plant compartments  
36 strongly shapes the diversity and composition of the microbiota. Different plant tissues such as  
37 leaves, roots, or flowers can harbor unique taxa, modulating microbe-microbe interactions, due to

38 both their structural differences and exposure to soil versus air and feeding back to host fitness  
39 (Fitzpatrick et al, 2020). Nevertheless, sometimes bacterial communities in leaves and roots can be  
40 surprisingly similar (Bai et al, 2015; Van der Heijden et al, 2016). While plant microbiomes are  
41 usually dominated by Proteobacteria (particularly those of the  $\alpha$  and  $\beta$  classes), and other major  
42 groups include Actinobacteria, Firmicutes, Bacteroidetes, Planctomycetes, Verrucomicrobia, and  
43 Acidobacteria (Turner et al, 2013), they can be variable and complex. In addition, existing evidence  
44 suggests that variation in the abiotic and biotic environment can also exert direct and indirect effects  
45 on plant-associated microbiota; climate-driven geographical variation can drive the composition of a  
46 microbiome (Oono, et al 2017; Harrison & Griffin, 2019). The plant microbiome therefore holds  
47 interesting parallels to other environmental systems and their microbiomes—for instance, the gut  
48 microbiome or the Earth microbiome—with conceptually similar questions regarding horizontal  
49 transfer of symbionts, diversity drivers, and influence in host niche expansion and plasticity (Redman  
50 et al, 2011; Redman et al, 2022). This is of importance in a global change context, for example, as  
51 global temperature increases and variation in both abiotic and biotic factors can indirectly shape plant  
52 microbiota through plant responses (Suryanarayanan & Shaanker, 2021; Ware, et al 2021). Given the  
53 known importance of plant microbiomes and their variations, examining the communities present on  
54 and within different and unique plant species has the potential to provide new insights.

55 Vernal pools—ephemeral bodies of water—provide habitat for specialized plants and animals, and  
56 represent an extreme version of the climatic variation characteristic of many other ecosystems. With  
57 seasonal water saturation during winter and gradual desiccation conditions the rest of the year, vernal  
58 pools (en español: *charcas vernaes*) trigger evolutionary processes of dormancy and amphibious life  
59 cycles with unique morphological traits. Many plant lineages have independently adapted to vernal  
60 pools conditions, including aquatic plants that have adapted to desiccation conditions (e.g. *Isoetes*  
61 *howellii*), and plants whose ancestors were terrestrial taxa that became aquatic (e.g. *Eryngium spp.*).  
62 Typically the aquatic morphology, ‘grass-like tufts’, is emblematic of the aquatic period of the pools  
63 in winter and early springtime. Later in the season, after evaporation and total desiccation of pools,  
64 plants acquire a terrestrial morphology that is spiny and resembles more woody herbaceous plants  
65 (Keeley, 1999). However, little is known about the microbiomes of these fascinating plants.

66 Interactions between plants and their associated microbes can provide higher fitness under extreme  
67 environmental conditions (Baedke, et al 2020; Trivedi et al, 2020) and in the context of future of  
68 agriculture practices (i.e. global change, artificial life support systems), achieving the ability to assist  
69 plants in rapidly adapting or acclimating signifies a milestone in the development of resilient crops.  
70 In this vein, amphibious plants, inhabiting ephemeral wetlands such as vernal pools are ideal study  
71 cases, as these plants tolerate wide extremes of water availability and other abiotic stress. These  
72 plants and their associated microbial symbionts can provide key insights into stress tolerance. To our  
73 knowledge, this study is the first of its kind in exploring amphibious plants and their associated  
74 microbiome. We examined *Eryngium castrense* (Apiaceae), colloquially known as the Great Valley  
75 button celery (Figure 1). This plant species is endemic to the California Central Valley, with several  
76 amphibious members of this genus in other regions of California, USA, and Baja California, Mexico  
77 in other vernal pool complexes.

78 In this present study, we investigated the dynamics of the microbiome (specifically bacterial  
79 endophytes) within the amphibious vernal pool plant *E. castrense*. Our first objective was to compare  
80 the differences in endophytic community diversity and composition between the aquatic and  
81 terrestrial stages of these plants. We hypothesized that if the microbial community plays a role in  
82 plant stress tolerance during extreme stages, we would observe shifts in the community composition  
83 and diversity aligned with aquatic and desiccation stages. Additionally, we examined the

84 differentiation within the host habitat by comparing the root and shoot compartments. We aimed to  
85 determine whether these plant compartments harbor distinct microbial communities, reflecting the  
86 different above-ground and below-ground needs of the plant. We also examined community  
87 assembly at the ecosystem level, focusing on differences in composition and diversity between  
88 endophytic communities and immediate plant surroundings, including the soil surrounding the roots  
89 and the water column that is in contact with the shoots. Our objective was to identify a unique core  
90 microbiome in the soil, water, and plants, indicating the presence of specific ecological niches.  
91 Finally, we investigated the influence of the surrounding environment as a filtering agent for  
92 community composition. We aimed to understand the extent to which the microbiome of amphibious  
93 plants is shaped by the plant host, environmental selection, or dispersal, considering the influence of  
94 landscape heterogeneity. Our overarching hypothesis motivating this work was that the microbial  
95 community is relevant to plant stress tolerance across the extreme stages in vernal pools, with  
96 microbes supporting critical functions when the plant host is subject to desiccation and water  
97 saturation stresses. We anticipated that compartmentalization within the plant, based on tissue  
98 differentiation, would result in niche specificity, with distinct microbial functions within shoots and  
99 roots. Additionally, we expected that landscape properties would influence the composition of the  
100 plant microbiome.

## 101 2 Methods

### 102 1.1 Study area

103 The study area is located in the heart of the San Joaquin Valley, California, USA, a 400 kilometers  
104 long and 80 kilometers wide open are, flanked on the east by the Sierra Nevada and on the west by  
105 the Coast Range mountains. The climate of the region is Mediterranean, characterized by cool, wet  
106 winters and hot, dry summers; annual rainfall generally ranges from 230-380 mm with 90% of the  
107 precipitation occurring from November to April. The western and eastern boundaries of the region  
108 delimit a distinct topographic and biogeographic unit of undulating terrain, from above the historic  
109 San Joaquin River floodplain, to the base of the Sierra Nevada foothills. This area supports the  
110 largest block of unfragmented vernal pool habitat remaining in California, characterized by low-slope  
111 basins with undulating *mima mound* topography that typically supports a high density of vernal pools  
112 (Vollmar, 2002). The sampling was performed at the University of California, Merced Vernal Pools  
113 and Grassland Reserve (MVPGR) (Figure 2), adjacent to the main campus of the University of  
114 California, Merced. The MVPGR is tightly managed for conservation. However, we hypothesized  
115 that development effects may be stronger on the west side of the reserve facing campus and the city  
116 of Merced. On the western boundary of the reserve, activities derived from land management, such as  
117 high cattle concentration, disturbances derived from urbanization, such as concrete dust, light  
118 pollution, noise or, activities derived from the UC campus such as visitors, trash, and motor vehicles,  
119 may lead to alterations of the natural landscape and create an anthropogenic impact zone.

### 120 1.2 Sampling

121 During the first months of life development, *Eryngium castrense* resembles aquatic grasses  
122 (“isoetoid” morphology, Fig 1a), extended above the vernal pool water surface. After the pool dries  
123 out, it becomes weedy, with sharp, spiny leaves (Fig 1b), flowering throughout the hot summer  
124 (Preston, et al 2023). This plant species has well-differentiated roots and shoots, and a differentiated  
125 phenotype as a result of the metamorphosis from aquatic to terrestrial morphology, corresponding to  
126 soil flooding and desiccation. *E. castrense* is a glabrous, ascending herbaceous plant, multi-branched  
127 and spiny, with lanceolate, deeply pinnate leaves (Baldwin & Goldman, 2012; Preston, et al 2023).

128 This plant species is abundant inside the limits of UC Merced's Vernal pools and grassland reserve  
129 and many vernal pools in California's Central Valley.

130 Collections of specimens of *E. castrense* were made at five vernal pools (Table 1). Sites were  
131 selected by following a five-kilometer transect, starting from the western boundary of the reserve,  
132 adjacent to the UC Merced campus, moving east, each site one kilometer apart. Collections were  
133 made in two seasons; during the aquatic period, which occurred in winter 2018 and comprised 20  
134 plant specimens (four individuals per pool); followed by a collection of 25 specimens (five  
135 individuals per pool) in late spring 2018, for a total of 45 plant specimens. This sampling comprised  
136 the aquatic root and the shoot during wintertime (inundation of the basin of the vernal pool), and the  
137 terrestrial root and shoot during springtime, respectively, therefore, a final number of 90 tissue  
138 samples were used. In addition to plant tissue samples per vernal pools, parallel collections of soil  
139 and water were included in the study to obtain a panoramic view of the microbial dynamics across  
140 the ecosystem layers, from soil, to water column and plant tissues.

### 141 **1.3 Sterilization of tissues and library preparation**

142 Sterilization was performed at the laboratory following a mechanical procedure: two rinses with  
143 distilled water for two minutes each, to separate the soil aggregates from the biological sample. The  
144 following rinses were then used: ethanol 75%, one rinse for one minute; Milli Q water, one rinse for  
145 two minutes; bleach 5%, once rinse for one minute; and Milli Q water, one rinse for five minutes  
146 (Guzman, et al 2020). After the sterilization, roots and shoots were separated with an autoclaved  
147 blade, fast-frozen by liquid nitrogen, and pulverized using a mortar. From the pulverized plant tissue,  
148 0.2g was measured and processed with a Qiagen PowerSoil<sup>®</sup> DNA extraction kit. A total of 95  
149 extracted DNA aliquots were obtained from tissues for sequencing the 16S rRNA gene. In separate,  
150 soil samples and water samples collected to compare with plant tissue samples, were processed  
151 following the protocol in Montiel-Molina, et al. (2021), for a total of 10 extracted DNA aliquots, 5  
152 from soil samples and 5 from water samples.

153 Prior to PCR amplification and library preparation, extracted DNA aliquots were analyzed for  
154 concentration and purity via Qbit<sup>®</sup> technology. Peptide nucleic acid (PNA) clamps to prevent the  
155 amplification of plant mitochondria and chloroplast DNA were added to each PCR master mix  
156 (Lundberg et al, 2013). A 50ul PCR mix was prepared for each sample as follows: water 31.8 ul;  
157 Buffer 1x 31.8ul; dNTP(0.2uM) 1ul; 926R\_Adapter (0.4uM) 2ul; PNA chloroplast (1.2uM) 0.6ul;  
158 PNA mitochondria (1.2uM) 0.6ul; BSA (0.2 mg/ml) 1ul; Taq(0.1 U/ul) 1ul; Barcode primers (10uM)  
159 2ul; DNA template 5ul. Barcoded primers targeting the 16s rRNA V4-V6 coding regions  
160 (515F\_915R) were used for the analysis of the bacterial endophytes (Quince, et al 2011; Apprill, et al  
161 2015; Parada, et al 2016). The thermocycler was programmed as follows: 94°C for 3 min; 35 cycles  
162 at 94°C for 45 sec; 78°C for 10 sec; 50°C for 30 sec; 72°C for 1 min; 72°C for 10 min and then held  
163 at 4°C. Final aliquots were analyzed for DNA concentrations using a Qbit<sup>®</sup> and pooled together for  
164 purification. Sequencing was achieved on the Illumina MiSeq<sup>®</sup> at UC Davis Genome Center. Soil  
165 and water samples were prepared and analyzed at Argonne National Lab, Chicago.

### 166 **1.4 Bioinformatics and diversity analysis**

167 The platform Qiime2-v.2022.2 (Bolyen et al, 2019) was used for microbiome bioinformatics analyses  
168 of plant tissues, soil and water samples, and preliminary microbiome analysis. Sequence reads were  
169 processed with DADA2 after demultiplexing, to filter chimeric reads from the analysis and to infer  
170 amplicon sequence variants (ASVs) (Callahan et al, 2016). The SILVA database was used to assign



171 taxonomic ranks (Quast et al, 2013). Chloroplast and mitochondria sequences were filtered from all  
172 analyses. Low sequence reads were found in terrestrial samples (shoots) from the sites KM4 and  
173 KM5, and these samples were removed from further analysis.

174 For plant samples we assessed diversity across vernal pool compartments, roots and shoots and plant  
175 host morphology (aquatic and terrestrial, water and soils samples. Analysis was made with R studio  
176 (v.1.3.1093) using the package Qiime2R-v0.99.1 (Bisanz, 2018) to manage artifacts produced with  
177 Qiime2. Diversity and community composition analysis, comprising alpha diversity, relative  
178 abundances, distance metrics (Bray-Curtis, Unifrac), and dissimilarity analysis between samples  
179 (PCA, ADONIS-PERMANOVA) were performed using Qiime2-v2022.2 (Bolyen et al, 2019),  
180 Phyloseq-v1.36.0 (McMurdie & Holmes, 2013) and Microbiome-v1.14.0 (Lahti et al, 2017). Pearson  
181 correlations and Mantel tests were performed with Vegan 2.6-4 (Oksanen et al, 2022), to assess the  
182 effect of environmental properties, the distance between sampling sites and anthropogenic  
183 disturbance on microbial community composition. Heatmaps for abundant taxa within tissue samples  
184 were produced with Phyloseq-v1.36.0 (McMurdie & Holmes, 2013). We blasted sequences from the  
185 top 30 ASVs against the NCBI database to determine their identity and potential function.

186 Analysis of the core microbiome of roots were considered given data robustness in diversity analysis.  
187 Data from plant roots samples and additional soil and water samples were processed with the R  
188 package Microbiome-v1.14.0 (Lahti et al, 2017), and graphical representations were made with the  
189 Venn diagram in Euler-v7.2.2 (Larsson, 2022). The core microbiome was defined as taxa present in  
190 least 90% of the samples. Core microbiome sequences were blasted against the NCBI database.

## 191 **2 Results**

192 We observed clear differences in the diversity of microbial communities across the plant life cycle  
193 (aquatic and terrestrial) and plant compartments (root and shoot). Proteobacteria and Bacteroidetes  
194 taxa dominated the community of microbial endophytes across both plant life cycle and  
195 compartments, but with multiple patterns in community dynamics (see below). Samples varied  
196 greatly in the number of ASVs present, with rarefaction curves reaching asymptotes at a sampling  
197 depth below 1000 sequences (Supplementary Fig. 1).

### 198 **2.1 Representative taxa in amphibious plants**

199 Samples varied substantially in taxa composition. At the phylum level, Bacteroidetes and  
200 Proteobacteria dominated the microbiome of *E. castranse*, followed by Acidobacteria,  
201 Cyanobacteria, Firmicutes, Verrucomicrobia and Tenericutes (Fig 3). The classes  
202 Alphaproteobacteria, Betaproteobacteria, Flavobacteria, Gammaproteobacteria, Saprospirae, and  
203 Sphingobacteria were the most abundant across plant compartments. Taxa from the phylum  
204 Bacteroidetes were present mostly in roots and we observed an evident shift in taxa abundance  
205 between the aquatic stage and terrestrial stage. Within this phylum, Chitinophagaceae,  
206 Cytophagaceae, Flavobacteriaceae and Sphingobacteriaceae families were represented in roots  
207 samples, and Weeksellaceae was only present in roots samples of the terrestrial morphological stage.  
208 Proteobacteria were represented by Alphaproteobacteria, Betaproteobacteria, Deltaproteobacteria,  
209 Epsilonproteobacteria, and Gammaproteobacteria; roots harbored the most taxa in these classes in  
210 aquatic and terrestrial samples. Firmicutes and Actinobacteria were mostly present in terrestrial roots,  
211 whereas phyla such as Verrucomicrobia and Tenericutes were present in all plant samples. Firmicutes  
212 of the class Clostridia were detected mostly in samples from roots in the aquatic stage, with taxa in  
213 the family Veillonellaceae, Clostridiaceae, Bacillaceae, Peptostreptococcaceae and  
214 Lachnospiraceae. Taxa in the phylum Acidobacteria belonged to the families Bryobacteraceae,

215 Acidobacteriaceae, Holophagacea, Koribacteraceae, Solibacteraceae, Ellin6075, MV65 and OPB3,  
216 mostly present in samples representing the aquatic stage in roots, and absent in shoots; in contrast  
217 terrestrial stage only allocated taxa in the family Acidobacteriaceae. We detected unknown taxa from  
218 the phylum Cyanobacteria mostly in shoots samples of the terrestrial stage. Taxa from the  
219 Phormidiaceae family were detected in shoots of the aquatic phase and taxa from the family  
220 Pseudanabaenaceae were detected in aquatic roots.

## 221 **2.2 Microbial endophytic communities across plant compartments and plant morphology.**

222 Community dissimilarity among samples was analyzed using Unweighted-Unifrac and Bray-Curtis  
223 metrics, and the significance of sample clustering was corroborated by the ordination method  
224 Principal Component Analysis (Fig. 4) and PERMANOVA-ADONIS (Table 2). The samples were  
225 best defined by aquatic and terrestrial morphological stages of the plant specimens, followed by roots  
226 and shoots. The ordination analysis resulted in the formation of distinct clusters. One cluster  
227 consisted of samples corresponding to roots in the terrestrial morphological stage, while another  
228 cluster consisted of samples with roots in the aquatic morphological stage. Additionally, there was a  
229 cluster composed of samples defined by shoots in the terrestrial morphology, and a diffuse cluster  
230 formed by shoots in the aquatic morphological stage. PERMANOVA-ADONIS of Bray-Curtis and  
231 Unweighted-Unifrac dissimilarity indexes validated a significant differentiation between plant  
232 compartments and morphological stages (Table 2).

233 Alpha diversity, as measured by richness, Shannon index, Simpson's index, ACE (abundance-based  
234 coverage estimators), and Simpson's evenness, also displayed differences between roots and shoots  
235 and between terrestrial and aquatic morphological stages. Root samples in both aquatic and terrestrial  
236 stages had higher diversity in contrast with shoots (Fig. 5). Aquatic stages showed higher overall  
237 diversity than terrestrial stages. Based on the Kruskal-Wallis test, the difference in diversity between  
238 sample types was significant (Table 3).

239 The 30 most abundant sequences (Fig. 6) displayed varying percent sequence identity compared with  
240 taxa in the NCBI database, nevertheless in ecological terms, the composition reflected consistent  
241 niche differentiation according to plant compartment and between terrestrial and aquatic stages. For  
242 instance, Cytophagaceae spp, Chitinophaga spp, Oxalobacteraceae spp, Flavobacterium frigidarium,  
243 *Chitinophagia arvencicola*, *Cryseobacterium aquaticum*, *Pantoea agglomerans*, *Niastella soli* among  
244 a few other taxa within the families Mucilaginibacter, and Chitinophagia showed higher relative  
245 abundance in root tissues in both aquatic and terrestrial stages. Shoots harbored fewer of these taxa,  
246 however, terrestrial shoots had relatively high abundances of *Pantoea agglomerans*, *Xanthomonas*  
247 *translucens*, and *Uzinura diaspadicola* (Fig. 6).

## 248 **Impact of water, soil, environmental factors, and geographic distance on the plant microbiome**

249 In contrast to the significant influence of plant compartments and plant morphology over the  
250 endophytic community, Pearson correlations showed no significant influence from the landscape  
251 spatial distances, anthropogenic activities, or soil properties. The Mantel test showed no significant  
252 distance-decay relationship between plant sample community dissimilarity and geographical distance  
253 between sites (supplementary Table 1).

254 Comparisons between communities in the plant endosphere and those in the surrounding water and  
255 soil environment showed differentiation. Beta diversity analysis showed habitat differentiation  
256 between samples of aquatic root morphology, terrestrial root morphology, soil and water from vernal  
257 pools ecosystems (Supplementary Fig. 2). We analyzed the core microbiome from each of these

258 habitats; aquatic and terrestrial root tissues, water and soil (Table 4). Twenty one taxa represented the  
259 core microbiome in soil samples, and zero taxa in the case of water samples; six taxa represented the  
260 root endosphere (including aquatic and terrestrial stages), two taxa specifically belong to aquatic  
261 roots and three taxa belong to terrestrial roots, and only one taxon was shared between aquatic and  
262 terrestrial roots (Fig. 7).

### 263 **3 Discussion**

264 Plant species with an amphibious lifestyle are an interesting subject of study given their adaptations  
265 to contrasting conditions. These amphibious plants are mostly restricted to ephemeral wetlands  
266 known as vernal pools in Mediterranean climate regimes (Keeley and Zedler, 1998), where they have  
267 adapted to water deficit, which for some species has led to differentiated morphologies throughout  
268 their life cycle (Keeley, 1999). For this study, we aimed to obtain novel information from a plant-  
269 microbe symbiosis perspective by providing the first description of the microbial endophytes in  
270 amphibious plants and addressing the transitions during their life cycle. Information on microbial  
271 community assembly may be key to understanding the mechanism behind the amphibious behavior,  
272 as microbial symbionts could be involved in alleviating plant stress under desiccation conditions,  
273 with important implications for both agricultural and natural ecosystems where water becomes a  
274 limiting factor.

275 When vernal pool plants are young, they resemble an aquatic grass, and as they become mature their  
276 morphology is more similar to a spiny weed. We studied the dynamics of the endophytic community  
277 across the plant life cycle as a first step towards elucidating the potential role of microbes in  
278 alleviating the stress triggered by the inundation and conditions experienced by the plants. The  
279 results obtained from the beta diversity metrics defined two well-delimited niches according to  
280 aquatic and terrestrial stages and the morphology of the amphibious plants. Our result supported the  
281 hypothesis that the endophytic community varies by plant stage, and across the life cycle of the  
282 plant. Our results are consistent with Zhou et al (2023), who reported significant differences in the  
283 microbiome of young and mature specimens of *Suaeda salsa*, a plant inhabiting high salt  
284 concentration habitats. Our study yielded contrasting results regarding water stress compared to other  
285 studies—but this is likely due to the more pronounced differences in water availability captured in  
286 our study compared to the more limited differences examined previously. For example, in Eucalyptus  
287 trees, water deficit treatments were not a significant driver of microbial community variation  
288 (Dasgupta et al, 2020), and a study of pepper plants roots and fruits microbiomes reported that  
289 bacterial endophytes were not affected by water irrigation limitation (Cui, et al 2020). Both studies  
290 suggested that endophytic communities were resilient to water stress. Yet, in our study, plant stage  
291 (aquatic vs terrestrial) was a stronger driver of microbial community variation than compartment,  
292 supporting our hypothesis that endophytic communities of vernal pool plants shift significantly with  
293 the extremes that plants experience in vernal pool ecosystems. This may suggest a role for bacterial  
294 endophytes in alleviating part of the stress generated by the water deficit and inundation conditions  
295 within vernal pools. This result also suggests that amphibious plants have the capacity to select their  
296 symbionts. However, inoculation experiments will be required to test if recruitment of symbiotic  
297 microbial communities is part of vernal pool plant adaptation to the contrasting conditions of  
298 inundation and desiccation.

299  
300 Differences in microbial communities between compartments is generally attributed to the presence  
301 of differential bioactive compounds. For example, Toju et al. (2019) suggested that in tomato plants,  
302 alkaloids, caffeic acid derivatives, polysaccharides and alkenes affect the microbiome. We did not  
303 analyze secondary metabolites in our study, but the taxa associated with above- and below-ground

304 provide an approach to understand ecological relations (Table 5). Other reasons can include  
305 unhealthy conditions (with dark green leaves, signs of grazing) that diminish the diversity in the  
306 tissues (Yang et al, 2022). Finally, the niche differentiation can be also attributed by the lack of free  
307 entry of endophytes into living tissues in roots and shoots, which might require bacterial capabilities  
308 to hydrolyse the hydrophobic incrustations of the walls of epidermal, hypodermal, endodermal and  
309 other cortical cells (McCulley, 2001).

310 The microbial endophytic communities in our study were dominated by Bacteroidetes and  
311 Proteobacteria (Fig. 3), comparable to the endophytes in Eucalyptus, which require large amounts of  
312 water (Dasgupta et al, 2020) and aquatic habitats defined by low tides and high oxygen availability  
313 (Stevens et al, 2005). The Proteobacteria phylum is ubiquitous in both aquatic and terrestrial  
314 ecosystems, and endophytic taxa from this phylum fill important niches in relation with  
315 biogeochemical cycles such as nitrogen (Zhou et al, 2020, Bai et al 2022). Bacteroidetes are likewise  
316 involved in a variety of processes, including pathogen suppression (Lidbury et al, 2020). In our  
317 study, we observed taxa related with phytopathogens (although no symptoms of disease were noticed  
318 at the moment of handling specimens) and nitrogen fixers in roots during the aquatic stage of the  
319 plants, similar to rice crops (Verma et al, 2001). We summarize in Table 5 information about the top  
320 ASVs of endophytes to provide insight into their potential ecological role in amphibious plants.

321 Beyond niche differentiation by plant compartment, we examined the surrounding soil and water to  
322 compare microbiomes between these ecosystemic layers. These ecosystem compartments (soil, water  
323 and plant tissues) showed strong dissimilarities in bacterial community composition. Other studies  
324 have reported that endosphere, rhizosphere and soil hold a niche differentiation, and a transition from  
325 soil, rhizosphere, rhizoplane and plant endosphere, where diversity is higher outside the plant tissues  
326 (Wang et al, 2022). In our study, soil samples exhibited higher microbial diversity in comparison  
327 with plant tissues (supplementary Figure 3), and we detected a similar pattern when tissues were  
328 compared with water samples, however these samples were more variable than soil.

#### 329 **4 Conclusion**

330 In Mediterranean ecosystems where summer is characterized by desiccation and winter by  
331 inundation, amphibious plants specially adapted to conditions of stress are hypothesized to have  
332 microbial symbionts with the potential to alleviate water stress. This study shows that in the  
333 amphibious vernal pool plant *E. castranse*, plant host morphology and tissue compartmentalization  
334 has strong influence over the bacterial endophytic community assembly. Future research on microbial  
335 endophytes in amphibious plants should incorporate the assessment of the fungal endophytes as well,  
336 as fungi play a significant role in the plant microbiome and have unique ecological functions.

337 This pioneering study on the microbiome of vernal pool amphibious plants provides preliminary  
338 findings about the role of endophytes in ecosystems subject to environmental change events, with  
339 parallels in other systems in our changing world. The interactions and mechanics underlying this  
340 microbial-plant association is complex, with endophytic communities also occurring during periods  
341 of variation in oxygen concentrations and other effects within the environment not examined here.  
342 Future research should incorporate those other conditions, which have effects in other ecosystems  
343 and with other organisms. Presently, there is a growing interest in artificial environments that are  
344 resilient and have a circular energy flow. The microbiome of amphibious plants can be an interesting  
345 addition to research focusing on such technology. We propose that future research on the benefit of  
346 endophytes to amphibious plants involve an experimental approach, where plants are inoculated with  
347 endophytes and tested for survival in growing chambers, and we suggest the use of specimens within  
348 the same family plants that are used as crops as we did here, using *E. castranse*, a member of the



349 carrot family. The importance of these following steps will be useful for the implementation of  
350 agricultural systems.

351 We suggest exploring plant relatives from the carrot family for further studies, as the data obtained in  
352 this study can serve as a foundation for future research involving crop plants from the same family.

## 353 **5 References**

354 Akter, S., Park, J.-H., Rahman, M. M., and Huq, Md. A. (2021). *Niastella soli* sp. nov., isolated from  
355 rhizospheric soil of a persimmon tree. *International Journal of Systematic and Evolutionary*  
356 *Microbiology* 71. doi: 10.1099/ijsem.0.004870.

357 Apprill, A., McNally, S., Parsons, R., and Weber, L. (2015). Minor revision to V4 region SSU rRNA  
358 806R gene primer greatly increases detection of SAR11 bacterioplankton. *Aquatic Microbial Ecology*  
359 75, 129–137. doi: 10.3354/ame01753.

360 Baedke, J., Fábregas-Tejeda, A., and Nieves Delgado, A. (2020). The holobiont concept before  
361 Margulis. *Journal of Experimental Zoology Part B: Molecular and Developmental Evolution* 334,  
362 149–155. doi: 10.1002/jez.b.22931.

363 Bai, Y., Müller, D. B., Srinivas, G., Garrido-Oter, R., Potthoff, E., Rott, M., et al. (2015). Functional  
364 overlap of the Arabidopsis leaf and root microbiota. *Nature* 528, 364–369. doi: 10.1038/nature16192.

365 Baldani, J. I., Rouws, L., Cruz, L. M., Olivares, F. L., Schmid, M., and Hartmann, A. (2014). “The  
366 Family Oxalobacteraceae,” in *The Prokaryotes* (Berlin, Heidelberg: Springer Berlin Heidelberg),  
367 919–974. Available at: [http://dx.doi.org/10.1007/978-3-642-30197-1\\_291](http://dx.doi.org/10.1007/978-3-642-30197-1_291) [Accessed July 8, 2023].

368 Baldwin, B. G., Goldman, D. H., Keil, D. J., Patterson, R., and Rosatti, T. J. (2012). *The Jepson*  
369 *Manual: Vascular Plants of California*. Univ of California Press.

370 Bernardet, J.-F., Hugo, C., and Bruun, B. (2006). “The Genera *Chryseobacterium* and  
371 *Elizabethkingia*,” in *The Prokaryotes* (New York, NY: Springer New York), 638–676. Available at:  
372 [http://dx.doi.org/10.1007/0-387-30747-8\\_25](http://dx.doi.org/10.1007/0-387-30747-8_25) [Accessed July 7, 2023].

373 Berrios, L., and Ely, B. (2019). The Isolation and Characterization of Kronos, a Novel Caulobacter  
374 Rhizosphere Phage that is Similar to Lambdoid Phages. *Current Microbiology* 76, 558–565. doi:  
375 10.1007/s00284-019-01656-1.

376 Bisanz, J.E., 2018. qiime2R: Importing QIIME2 artifacts and associated data into R sessions. Version  
377 0.99, 13.

378 Bolyen, E., Rideout, J. R., Dillon, M. R., Bokulich, N. A., Abnet, C. C., Al-Ghalith, G. A., et al.  
379 (2019). Reproducible, interactive, scalable and extensible microbiome data science using QIIME 2.  
380 *Nature Biotechnology* 37, 852–857. doi: 10.1038/s41587-019-0209-9.

381 Callahan, B. J., McMurdie, P. J., Rosen, M. J., Han, A. W., Johnson, A. J. A., and Holmes, S. P.  
382 (2016). DADA2: High-resolution sample inference from Illumina amplicon data. *Nature Methods* 13,  
383 581–583. doi: 10.1038/nmeth.3869.

- 384 Carrell, A. A., and Frank, A. C. (2014). *Pinus flexilis* and *Picea engelmannii* share a simple and  
385 consistent needle endophyte microbiota with a potential role in nitrogen fixation. *Frontiers in*  
386 *Microbiology* 5. doi: 10.3389/fmicb.2014.00333.
- 387 Cruz, A. T., Cazacu, A. C., and Allen, C. H. (2007). *Pantoea agglomerans*, a Plant Pathogen  
388 Causing Human Disease. *Journal of Clinical Microbiology* 45, 1989–1992. doi: 10.1128/jcm.00632-  
389 07.
- 390 Cui, B., Hu, C., Fan, X., Cui, E., Li, Z., Ma, H., et al. (2020). Changes of endophytic bacterial  
391 community and pathogens in pepper (*Capsicum annuum* L.) as affected by reclaimed water irrigation.  
392 *Applied Soil Ecology* 156, 103627. doi: 10.1016/j.apsoil.2020.103627.
- 393 Dasgupta, M. G., Burragoni, S., Amrutha, S., Muthupandi, M., Parveen, A. B. M., Sivakumar, V., et  
394 al. (2020). Diversity of bacterial endophyte in *Eucalyptus* clones and their implications in water  
395 stress tolerance. *Microbiological Research* 241, 126579. doi: 10.1016/j.micres.2020.126579.
- 396 Fan, D., Subramanian, S., and Smith, D. L. (2020). Plant endophytes promote growth and alleviate  
397 salt stress in *Arabidopsis thaliana*. *Scientific Reports* 10. doi: 10.1038/s41598-020-69713-5.
- 398 Fernández-González, A. J., Villadas, P. J., Gómez-Lama Cabanás, C., Valverde-Corredor, A., Belaj,  
399 A., Mercado-Blanco, J., et al. (2019). Defining the root endosphere and rhizosphere microbiomes  
400 from the World Olive Germplasm Collection. *Scientific Reports* 9. doi: 10.1038/s41598-019-56977-  
401 9.
- 402 Fitzpatrick, C. R., Salas-González, I., Conway, J. M., Finkel, O. M., Gilbert, S., Russ, D., et al.  
403 (2020). The Plant Microbiome: From Ecology to Reductionism and Beyond. *Annual Review of*  
404 *Microbiology* 74, 81–100. doi: 10.1146/annurev-micro-022620-014327.
- 405 Harrison, J. G., and Griffin, E. A. (2019). The diversity and distribution of endophytes across biomes,  
406 plant phylogeny, and host tissues—how far have we come and where do we go from here? Cold  
407 Spring Harbor Laboratory Available at: <http://dx.doi.org/10.1101/793471> [Accessed July 7, 2023].
- 408 Hiraishi, A., Matsuzawa, Y., Kanbe, T., and Wakao, N. (2000). *Acidisphaera rubrifaciens* gen. nov.,  
409 sp. nov., an aerobic bacteriochlorophyll-containing bacterium isolated from acidic environments.  
410 *International Journal of Systematic and Evolutionary Microbiology* 50, 1539–1546. doi:  
411 10.1099/00207713-50-4-1539.
- 412 Humphry, D. R., George, A., Black, G. W., and Cummings, S. P. (2001). *Flavobacterium frigidarium*  
413 sp. nov., an aerobic, psychrophilic, xylanolytic and laminarinolytic bacterium from Antarctica.  
414 *International Journal of Systematic and Evolutionary Microbiology* 51, 1235–1243. doi:  
415 10.1099/00207713-51-4-1235.
- 416 Keeley, J. E. (1999). Photosynthetic pathway diversity in a seasonal pool community. *Functional*  
417 *Ecology* 13, 106–118. doi: 10.1046/j.1365-2435.1999.00294.x.
- 418 Khan, H., Chung, E. J., Kang, D. Y., Jeon, C. O., and Chung, Y. R. (2013). *Mucilaginibacter*  
419 *jinjuensis* sp. nov., with xylan-degrading activity. *International Journal of Systematic and*  
420 *Evolutionary Microbiology* 63, 1267–1272. doi: 10.1099/ijs.0.043828-0.

- 421 Kim, B.-C., Poo, H., Lee, K. H., Kim, M. N., Kwon, O.-Y., and Shin, K.-S. (2012). *Mucilaginibacter*  
422 *angelicae* sp. nov., isolated from the rhizosphere of *Angelica polymorpha* Maxim. *International*  
423 *Journal of Systematic and Evolutionary Microbiology* 62, 55–60. doi: 10.1099/ijms.0.029728-0.
- 424 Kim, M., Shin, S.-K., and Yi, H. (2020a). *Mucilaginibacter celer* sp. nov. and *Aquirhabdus parva*  
425 gen. nov., sp. nov., isolated from freshwater. *International Journal of Systematic and Evolutionary*  
426 *Microbiology* 70, 5479–5487. doi: 10.1099/ijsem.0.004437.
- 427 Kim, Y.-J., Park, J. Y., Balusamy, S. R., Huo, Y., Nong, L. K., Thi Le, H., et al. (2020b).  
428 Comprehensive Genome Analysis on the Novel Species *Sphingomonas panacis* DCY99T Reveals  
429 Insights into Iron Tolerance of Ginseng. *International Journal of Molecular Sciences* 21, 2019. doi:  
430 10.3390/ijms21062019.
- 431 Kumar, R., Verma, H., Haider, S., Bajaj, A., Sood, U., Ponnusamy, K., et al. (2017). Comparative  
432 Genomic Analysis Reveals Habitat-Specific Genes and Regulatory Hubs within the  
433 Genus *Novosphingobium*. *mSystems* 2. doi: 10.1128/msystems.00020-17.
- 434 Lahti, L., & Shetty, S. (2017). microbiome R package. Bioconductor.  
435 <https://doi.org/10.18129/B9.bioc.microbiome>
- 436 Larsson, J., 2022. Eulerr: Area-Proportional Euler and Venn Diagrams with Ellipses. R package  
437 version 7.0.0, <https://CRAN.R-project.org/package=eulerr>.
- 438 Lidbury, I. D. E. A., Borsetto, C., Murphy, A. R. J., Bottrill, A., Jones, A. M. E., Bending, G. D., et  
439 al. (2020). Niche-adaptation in plant-associated Bacteroidetes favours specialisation in organic  
440 phosphorus mineralisation. *The ISME Journal* 15, 1040–1055. doi: 10.1038/s41396-020-00829-2.
- 441 Lin, S.-Y., Hameed, A., Hsu, Y.-H., Liu, Y.-C., Lai, W.-A., and Young, C.-C. (2017). *Filimonas*  
442 *aquilariae* sp. nov., isolated from agarwood chips. *International Journal of Systematic and*  
443 *Evolutionary Microbiology* 67, 3219–3225. doi: 10.1099/ijsem.0.002087.
- 444 Lu, Z., Rämngård, C., Ergenlioğlu, İ., Sandin, L., Hammar, H., Andersson, H., et al. (2023). Multiple  
445 enzymatic approaches to hydrolysis of fungal  $\beta$ -glucans by the soil bacterium *Chitinophaga pinensis*.  
446 *The FEBS Journal* 290, 2909–2922. doi: 10.1111/febs.16720.
- 447 Lundberg, D. S., Yourstone, S., Mieczkowski, P., Jones, C. D., and Dangl, J. L. (2013). Practical  
448 innovations for high-throughput amplicon sequencing. *Nature Methods* 10, 999–1002. doi:  
449 10.1038/nmeth.2634.
- 450 Manter, D. K., Delgado, J. A., Holm, D. G., and Stong, R. A. (2010). Pyrosequencing Reveals a  
451 Highly Diverse and Cultivar-Specific Bacterial Endophyte Community in Potato Roots. *Microbial*  
452 *Ecology* 60, 157–166. doi: 10.1007/s00248-010-9658-x.
- 453 McCully, M. E. (2001). Niches for bacterial endophytes in crop plants: a plant biologist's view.  
454 *Functional Plant Biology* 28, 983. doi: 10.1071/pp01101.
- 455 McMurdie, P. J., and Holmes, S. (2013). phyloseq: An R Package for Reproducible Interactive  
456 Analysis and Graphics of Microbiome Census Data. *PLoS ONE* 8, e61217. doi:  
457 10.1371/journal.pone.0061217.

- 458 Morelli, M., Bahar, O., Papadopoulou, K. K., Hopkins, D. L., and Obradović, A. (2020). Editorial:  
459 Role of Endophytes in Plant Health and Defense Against Pathogens. *Frontiers in Plant Science* 11.  
460 doi: 10.3389/fpls.2020.01312.
- 461 Noar, J. D., and Buckley, D. H. (2009). *Ideonella azotifigens* sp. nov., an aerobic diazotroph of the  
462 Betaproteobacteria isolated from grass rhizosphere soil, and emended description of the genus  
463 *Ideonella*. *INTERNATIONAL JOURNAL OF SYSTEMATIC AND EVOLUTIONARY*  
464 *MICROBIOLOGY* 59, 1941–1946. doi: 10.1099/ijs.0.003368-0.
- 465 Noh, H.-J., Shin, S. C., Park, Y., Choi, A., Baek, K., Hong, S. G., et al. (2020). *Lichenicola cladoniae*  
466 gen. nov., sp. nov., a member of the family Acetobacteraceae isolated from an Antarctic lichen.  
467 *International Journal of Systematic and Evolutionary Microbiology* 70, 5918–5925. doi:  
468 10.1099/ijsem.0.004495.
- 469 Oksanen, J., 2020. *Vegan: ecological diversity*. R project, Version 2.6-4
- 470 Oono, R., Rasmussen, A., and Lefèvre, E. (2017). Distance decay relationships in foliar fungal  
471 endophytes are driven by rare taxa. *Environmental Microbiology* 19, 2794–2805. doi: 10.1111/1462-  
472 2920.13799.
- 473 Pankratov, T. A., Grouzdev, D. S., Patutina, E. O., Kolganova, T. V., Berestovskaya, J. J., and  
474 Ashikhmin, A. A. (2020). *Lichenicoccus roseus* gen. nov., sp. nov., the first bacteriochlorophyll a-  
475 containing, psychrophilic and acidophilic Acetobacteraceae bacteriobiont of lichen *Cladonia* species.  
476 *International Journal of Systematic and Evolutionary Microbiology* 70, 4591–4601. doi:  
477 10.1099/ijsem.0.004318.
- 478 Pankratov, T. A., Kulichevskaya, I. S., Liesack, W., and Dedysh, S. N. (2006). Isolation of aerobic,  
479 gliding, xylanolytic and laminarinolytic bacteria from acidic Sphagnum peatlands and emended  
480 description of *Chitinophaga arvensicola* Kämpfer et al. 2006. *International Journal of Systematic and*  
481 *Evolutionary Microbiology* 56, 2761–2764. doi: 10.1099/ijs.0.64451-0.
- 482 Parada, A. E., Needham, D. M., and Fuhrman, J. A. (2015). Every base matters: assessing small  
483 subunit rRNA primers for marine microbiomes with mock communities, time series and global field  
484 samples. *Environmental Microbiology* 18, 1403–1414. doi: 10.1111/1462-2920.13023.
- 485 Preston Robert E., Michael S. Park, Lincoln Constance 2012, *Eryngium castrense*, in Jepson Flora  
486 Project (eds.) Jepson eFlora, [https://ucjeps.berkeley.edu/eflora/eflora\\_display.php?tid=25076](https://ucjeps.berkeley.edu/eflora/eflora_display.php?tid=25076)
- 487 Quast, C., Pruesse, E., Yilmaz, P., Gerken, J., Schweer, T., Yarza, P., et al. (2012). The SILVA  
488 ribosomal RNA gene database project: improved data processing and web-based tools. *Nucleic Acids*  
489 *Research* 41, D590–D596. doi: 10.1093/nar/gks1219.
- 490 Quince, C., Lanzen, A., Davenport, R. J., and Turnbaugh, P. J. (2011). Removing Noise From  
491 Pyrosequenced Amplicons. *BMC Bioinformatics* 12. doi: 10.1186/1471-2105-12-38.
- 492 Raj, Y., Kumar, A., Kumari, S., Kumar, R., and Kumar, R. (2023). Comparative Genomics and  
493 Physiological Investigations Supported Multifaceted Plant Growth-Promoting Activities in Two  
494 *Hypericum perforatum* L.-Associated Plant Growth-Promoting Rhizobacteria for Microbe-Assisted  
495 Cultivation. *Microbiology Spectrum* 11. doi: 10.1128/spectrum.00607-23.



- 496 Redman, R. S., Anderson, J. A., Biaggi, T. M., Malmberg, K. E. L., Rienstra, M. N., Weaver, J. L., et  
497 al. (2022). Symbiotic Modulation as a Driver of Niche Expansion of Coastal Plants in the San Juan  
498 Archipelago of Washington State. *Frontiers in Microbiology* 13. doi: 10.3389/fmicb.2022.868081.
- 499 Redman, R. S., Kim, Y. O., Woodward, C. J. D. A., Greer, C., Espino, L., Doty, S. L., et al. (2011).  
500 Increased Fitness of Rice Plants to Abiotic Stress Via Habitat Adapted Symbiosis: A Strategy for  
501 Mitigating Impacts of Climate Change. *PLoS ONE* 6, e14823. doi: 10.1371/journal.pone.0014823.
- 502 Rodriguez, R., Woodward, C., Kim, Y.-O., and Redman, R. (2009). “Habitat-Adapted Symbiosis as a  
503 Defense against Abiotic and Biotic Stresses,” in *Mycology* (CRC Press). Available at:  
504 <http://dx.doi.org/10.1201/9781420069327.ch20> [Accessed July 7, 2023].
- 505 Sabree, Z. L., Huang, C. Y., Okusu, A., Moran, N. A., and Normark, B. B. (2013). The nutrient  
506 supplying capabilities of *Uzinura*, an endosymbiont of armoured scale insects. *Environmental*  
507 *Microbiology* 15, 1988–1999. doi: 10.1111/1462-2920.12058.
- 508 Saldierna Guzmán, J. P., Nguyen, K., and Hart, S. C. (2020). Simple methods to remove microbes  
509 from leaf surfaces. *Journal of Basic Microbiology* 60, 730–734. doi: 10.1002/jobm.202000035.
- 510 Sapkota, S., Mergoum, M., and Liu, Z. (2020). The translucens group of *Xanthomonas*  
511 translucens : Complicated and important pathogens causing bacterial leaf streak on cereals.  
512 *Molecular Plant Pathology* 21, 291–302. doi: 10.1111/mpp.12909.
- 513 Stevens, H., Stübner, M., Simon, M., and Brinkhoff, T. (2005). Phylogeny of Proteobacteria and  
514 Bacteroidetes from oxic habitats of a tidal flat ecosystem. *FEMS Microbiology Ecology* 54, 351–365.  
515 doi: 10.1016/j.femsec.2005.04.008.
- 516 Suryanarayanan, T. S., and Shaanker, R. U. (2021). Can fungal endophytes fast-track plant  
517 adaptations to climate change? *Fungal Ecology* 50, 101039. doi: 10.1016/j.funeco.2021.101039.
- 518 Toju, H., Okayasu, K., and Notaguchi, M. (2019). Leaf-associated microbiomes of grafted tomato  
519 plants. *Scientific Reports* 9. doi: 10.1038/s41598-018-38344-2.
- 520 Trivedi, P., Leach, J. E., Tringe, S. G., Sa, T., and Singh, B. K. (2020). Plant–microbiome  
521 interactions: from community assembly to plant health. *Nature Reviews Microbiology* 18, 607–621.  
522 doi: 10.1038/s41579-020-0412-1.
- 523 Turner, T. R., James, E. K., and Poole, P. S. (2013). The plant microbiome. *Genome Biology* 14, 1–  
524 10. doi: 10.1186/gb-2013-14-6-209.
- 525 van der Heijden, M. G. A., and Hartmann, M. (2016). Networking in the Plant Microbiome. *PLOS*  
526 *Biology* 14, e1002378. doi: 10.1371/journal.pbio.1002378.
- 527 Verma, S. (2001). Evaluation of plant growth promoting and colonization ability of endophytic  
528 diazotrophs from deep water rice. *Journal of Biotechnology* 91, 127–141. doi: 10.1016/s0168-  
529 1656(01)00333-9.
- 530 Videira, S. S., de Araujo, J. L. S., da Silva Rodrigues, L., Baldani, V. L. D., and Baldani, J. I. (2009).  
531 Occurrence and diversity of nitrogen-fixing *Sphingomonas* bacteria associated with rice plants grown  
532 in Brazil. *FEMS Microbiology Letters* 293, 11–19. doi: 10.1111/j.1574-6968.2008.01475.x.

- 533 Vollmar, J. E. (2002). *Wildlife and Rare Plant Ecology of Eastern Merced County's Vernal Pool*  
534 *Grasslands*. Vollmar Consulting.
- 535 Wang, Z., Wang, H., Chen, Z., Wu, Q., Huang, K., Ke, Q., et al. (2022). Ecological niche differences  
536 regulate the assembly of bacterial community in endophytic and rhizosphere of Eucalyptus. *Forest*  
537 *Ecology and Management* 524, 120521. doi: 10.1016/j.foreco.2022.120521.
- 538 Ware, I. M., Van Nuland, M. E., Yang, Z. K., Schadt, C. W., Schweitzer, J. A., and Bailey, J. K.  
539 (2021). Climate-driven divergence in plant-microbiome interactions generates range-wide variation  
540 in bud break phenology. *Communications Biology* 4. doi: 10.1038/s42003-021-02244-5.
- 541 Wiewióra, B., and Żurek, G. (2021). The Response of the Associations of Grass and Epichloë  
542 Endophytes to the Increased Content of Heavy Metals in the Soil. *Plants* 10, 429. doi:  
543 10.3390/plants10030429.
- 544 Yang, J., Masoudi, A., Li, H., Gu, Y., Wang, C., Wang, M., et al. (2022). Microbial community  
545 structure and niche differentiation under different health statuses of *Pinus bungeana* in the Xiong'an  
546 New Area in China. *Frontiers in Microbiology* 13. doi: 10.3389/fmicb.2022.913349.
- 547 Zedler, P. H. (2003). Vernal pools and the concept of “isolated wetlands.” *Wetlands* 23, 597–607.  
548 doi: 10.1672/0277-5212(2003)023[0597:vpatco]2.0.co;2.
- 549 Zhou, Y., Wei, Y., Ryder, M., Li, H., Zhao, Z., Toh, R., et al. (2023). Soil salinity determines the  
550 assembly of endophytic bacterial communities in the roots but not leaves of halophytes in a river  
551 delta ecosystem. *Geoderma* 433, 116447. doi: 10.1016/j.geoderma.2023.116447.

## 552 6 Tables

553 **Table 1.** Sampling sites at Merced Vernal Pools and Grassland Reserve (MVPGR). Each site belongs  
554 to a single vernal pool, with a distance of one kilometer from each other. Three soil types are  
555 represented: Corning, Redding, and Hopeton.  
556

| <u>Collection ID</u> | <u>Site ID</u> | <u>Distance from urbanization</u> | <u>Soil parent material</u> | <u>Longitude</u> | <u>Latitude</u> |
|----------------------|----------------|-----------------------------------|-----------------------------|------------------|-----------------|
| MONT-0VP4            | K0             | 0 Kilometers                      | Corning                     | -120.42011       | 37.3788671      |
| MONT-1VP4            | K1             | 1 Kilometer                       | Redding                     | -120.41254       | 37.33804231     |
| MONT-2VP2            | K2             | 2 Kilometers                      | Redding                     | -120.40515       | 37.3878441      |
| MONT-3VP1            | K3             | 3 Kilometers                      | Corning                     | -120.38972       | 37.3898201      |
| MONT-4VP5            | K4             | 4 Kilometers                      | Corning                     | -120.37992       | 37.3889871      |
| MONT-5VP1            | K5             | 5 Kilometers                      | Hopeton                     | -120.376         | 37.3927671      |

557  
558  
559  
560  
561  
562

563 **Table 2.** PERMANOVA-ADONIS based on microbial community composition of aquatic roots,  
 564 aquatic shoots, terrestrial shoots, and terrestrial roots.

Permanova-ADONIS sample dissimilarity significance

| <i>Dissimilarity method</i>     | <i>Groups</i> | <i>SumsOfSq</i> | <i>MeanSqs</i> | <i>F.Model</i> | <i>R<sup>2</sup></i> | <i>Pr(&gt;F)</i> |
|---------------------------------|---------------|-----------------|----------------|----------------|----------------------|------------------|
| Plant compartment Unw-Unifrac   | 2             | 1.07            | 1.07           | 4.37           | 0.08                 | 0.001            |
| Morphological stage Unw-Unifrac | 2             | 1.19            | 1.19           | 4.91           | 0.08                 | 0.001            |
| Plant compartment Bray-Curtis   | 2             | 2.66            | 2.66           | 6.13           | 0.06                 | 0.001            |
| Morphological stage Bray-Curtis | 2             | 1.17            | 1.17           | 2.60           | 0.02                 | 0.001            |

565

566 **Table 3.** Kruskal-Wallis non parametric analysis on alpha diversity metrics between roots and  
 567 shoots samples, aquatic and terrestrial morphological stages.  
 568

| <i>Kruskal-Wallis Analysis</i> | <i>Shannon</i>      | <i>Simpson</i>      | <i>ACE</i>          | <i>S evenness</i> | <i>Richness</i>     |
|--------------------------------|---------------------|---------------------|---------------------|-------------------|---------------------|
| <b>Aquatic / Terrestrial</b>   | .003                | .001                | .04                 | .81               | .04                 |
| <b>Roots / Shots</b>           | 6.65 <sup>-11</sup> | 1.37 <sup>-11</sup> | 3.57 <sup>-12</sup> | .02 <sup>-3</sup> | 3.25 <sup>-12</sup> |

569

570

571

572

573

574

575

576

577

578

579

580

581

582

583 **Table 4.** Core microbiomes in roots, and soil samples, and percent identity with their closest match  
 584 in the NCBI database.

| Roots                             |                                    | Soil                                    |
|-----------------------------------|------------------------------------|-----------------------------------------|
| <i>terrestrial</i>                | <i>aquatic</i>                     |                                         |
| Duganella sp. [100%]              | Povalibacter sp. [95.71%]          | Ktedonobacter sp. [94.39%]              |
| Caulobacter rhizosphaerae [100%]  | Methylovorus glucosotrophus [100%] | Psychrosinus sp. [98.13%]               |
| Rhizobium cellulosilyticum [100%] | Novosphingobium sp. [100%]         | Candidus Koribacter sp. [97.33%]        |
| Novosphingobium sp. [100%]        |                                    | Uncultured Acidobacteria 1              |
|                                   |                                    | Uncultured Acidobacteria 2              |
|                                   |                                    | Koribacter versatilis [98.76%]          |
|                                   |                                    | Uncultured Actinomycete 1               |
|                                   |                                    | Uncultured Actinomycete 2               |
|                                   |                                    | Uncultured Acidobacteria 3              |
|                                   |                                    | Ramlibacter ginsenosidimutans [100%]    |
|                                   |                                    | Acidovorax avenae [100%]                |
|                                   |                                    | Uncultured bacterium 1                  |
|                                   |                                    | Psicinibacter sp. [100%]                |
|                                   |                                    | Bradyrhizobium japonicum [100%]         |
|                                   |                                    | Anaeromyxobacter sp.[98.7%]             |
|                                   |                                    | Anaeromyxobacter diazotrophicus [99.1%] |
|                                   |                                    | Uncultured bacterium 2                  |
|                                   |                                    | Geomonas subterranea [100%]             |
|                                   |                                    | Uncultured Deltaproteobacteria [99.8%]  |
|                                   |                                    | Uncultured Acidobacteracea [98.38%]     |
|                                   |                                    | Uncultured Actinobacteria [98.39%]      |

585

586

587

588

589

590

591

592

593

594

595

596

597



598 **Table 5.** Ecological role of top ASVs associated with amphibious plants.

| Bacterial taxa                     | Ecological role                                                                   | Niche                                        | % NCBI Identity | References                    |
|------------------------------------|-----------------------------------------------------------------------------------|----------------------------------------------|-----------------|-------------------------------|
| <i>Mucilaginibacter celer</i>      | Improves growth and salt tolerance, some isolates also from freshwater ecosystems | All                                          | 100%            | Kim et al, 2020               |
| <i>Dawida soli</i>                 | Heterotrophic aerobic metabolism, endophytes of roots                             | Roots terrestrial and aquatic                | 99%             | Manter et al, 2010            |
| <i>Sphingomonas panacis</i>        | Heavy metals resistance, rhizosphere resident                                     | Aquatic roots, shoots and terrestrial roots  | 100%            | Kim et al, 2019               |
| <i>Acidisphaera rubrifaciens</i>   | Acidic environments, aerobic, primary producer [bacteriochlorophyll-containing]   | Aquatic roots, shoots and terrestrial shoots | 97.86%          | Hiraishi et al, 2000          |
| <i>Chitinophaga pinesis</i>        | Chitin degradation, fungal cell walls degradation                                 | Roots                                        | 98%             | Lu et al, 2023                |
| <i>Sphingomona azotifigens</i>     | Nitrogen fixing bacteria, growth promoter                                         | Aquatic roots, shoots and terrestrial roots  | 99%             | Videira et al, 2009           |
| <i>Lichenicoccus roseus</i>        | Antarctic lichen symbiont, xylan decomposer                                       | Aquatic shoots                               | 97.59%          | Pankratov et al, 2020         |
| <i>Uzinura diaspidicola</i>        | Insects symbiont, nutrient acquisition                                            | All                                          | 100%            | Sabree et al, 2012            |
| <i>Duganella vulcaria</i>          | Endophytes roots and shoots, growth promoter                                      | Aquatic roots, shoots and terrestrial roots  | 100%            | Baldani et al, 2014           |
| <i>Ideonelle azotifigens</i>       | Rhizosphere, nitrogen fixer                                                       | Roots terrestrial and aquatic                | 100%            | Noar & Buckley, 2009          |
| <i>Rahnella variigena</i>          | Endophyte, growth promoter                                                        | Roots terrestrial and aquatic                | 100%            | Raj et al, 2023               |
| <i>Filimonas aquilariae</i>        | Plant roots resident, high CO <sub>2</sub> dependent                              | All                                          | 99%             | Lin et al, 2017               |
| <i>Chitinophaga arvensicola</i>    | Wetlands, plant detritivorous                                                     | Roots terrestrial and aquatic                | 98.38%          | Pankratov et al, 2006         |
| <i>Novosphingobium capsulatum</i>  | Rhizosphere inhabitant, Sulfuric metabolism: alkaline sulfonate assimilation      | Aquatic roots, shoots and aquatic shoots     | 99.46%          | Kumar et al 2017              |
| <i>Flavitalea</i> sp.              | Root endophyte                                                                    | Roots terrestrial and aquatic                | 98.65%          | Fernandez-Gonzalez et al 2019 |
| <i>Lichenicola cladoniae</i>       | Cold adapted lichen symbiont (Antarctica)                                         | All                                          | 100%            | Noh et al, 2020               |
| <i>Mucilaginibacter angelicae</i>  | Rhizosphere, cellulose-degrading                                                  | Roots terrestrial and aquatic                | 100%            | Kim et al 2012                |
| <i>Mucilaginobacter jinjuensis</i> | Rotten wood xylan-degrading, latent in plant roots                                | Roots terrestrial and aquatic                | 100%            | Khan et al, 2016              |

|                            |                                                                                                                    |                                  |       |                       |
|----------------------------|--------------------------------------------------------------------------------------------------------------------|----------------------------------|-------|-----------------------|
| Niastella soli             | Rhizosphere, denitrifier                                                                                           | Roots terrestrial and aquatic    | 99.9% | Akter et al, 2021     |
| Caulobacter henricii       | Fresh water and rhizosphere, associated with caulophages "Kronos"                                                  | Roots terrestrial and aquatic    | 100%  | Berrios and Ely, 2019 |
| Xanthomonas translucens    | Plant pathogen                                                                                                     | Roots terrestrial and aquatic    | 100%  | Sapkota et al, 2020   |
| Flavobacterium frigidarium | Sediments in Antarctica, detritivorous of plants and algae                                                         | Roots and less proportion shoots | 100%  | Humphry et al, 2001   |
| Chryseobacterium aquaticum | Fresh water, see also Elizabethkingia                                                                              | Roots terrestrial and aquatic    | 98%   | Bernardet et al, 2006 |
| Pantoea agglomerans        | Associated with plant roots. It could be associated with human infections via wound infection with plant material. | Terrestrial shoots               | 100%  | Cruz et al, 2007      |

## 599 7 Acknowledgments

600 We acknowledge the participation of Dr. Iolanda Ramalho da Silva, Andrea Salinas, David Pérez,  
601 Kehily Maldonado, Kimberly Du and other members from Frank, Sexton and Beman's labs.  
602 CONACyT- UCMexus, institutions who provided with financial support for Dr Montiel-Molina  
603 during his tenure as a doctoral student. To the California Native Plant Society who provided financial  
604 support, and UC Merced Natural Reserve System allowing to perform the research at the UCMerced  
605 Vernal Pools and Grassland Reserve.

606

607



(A)

(B)

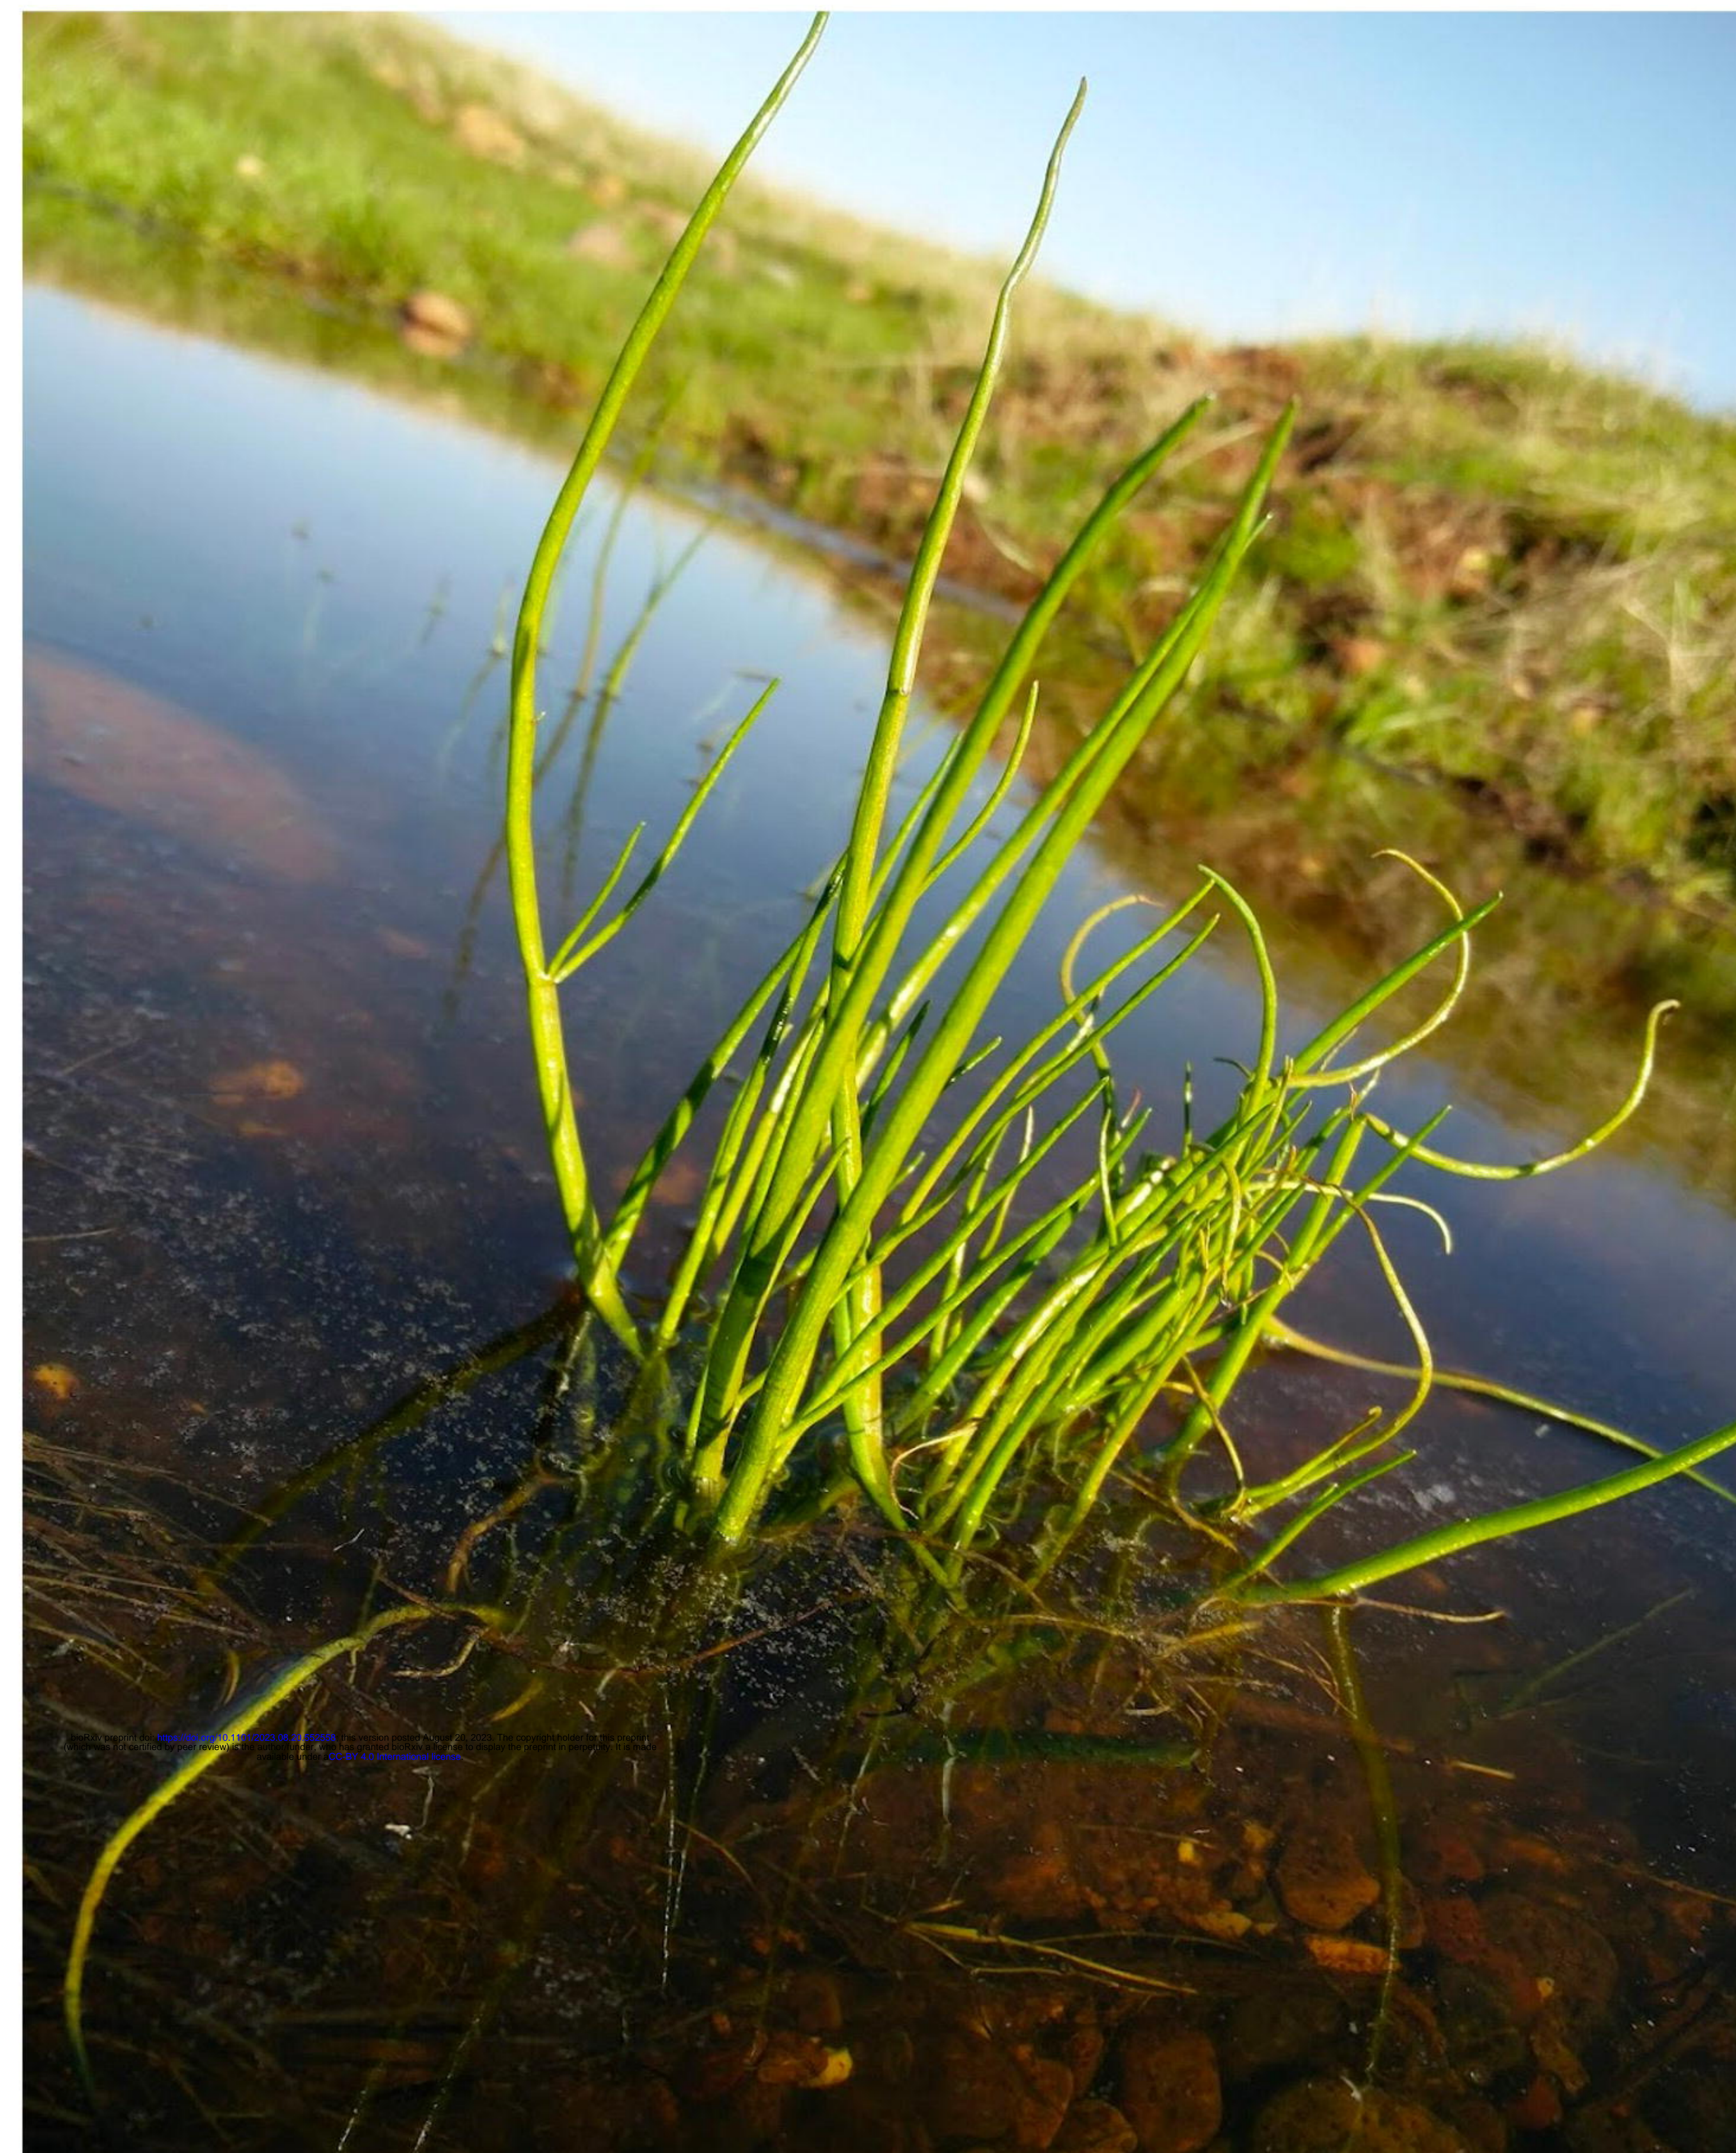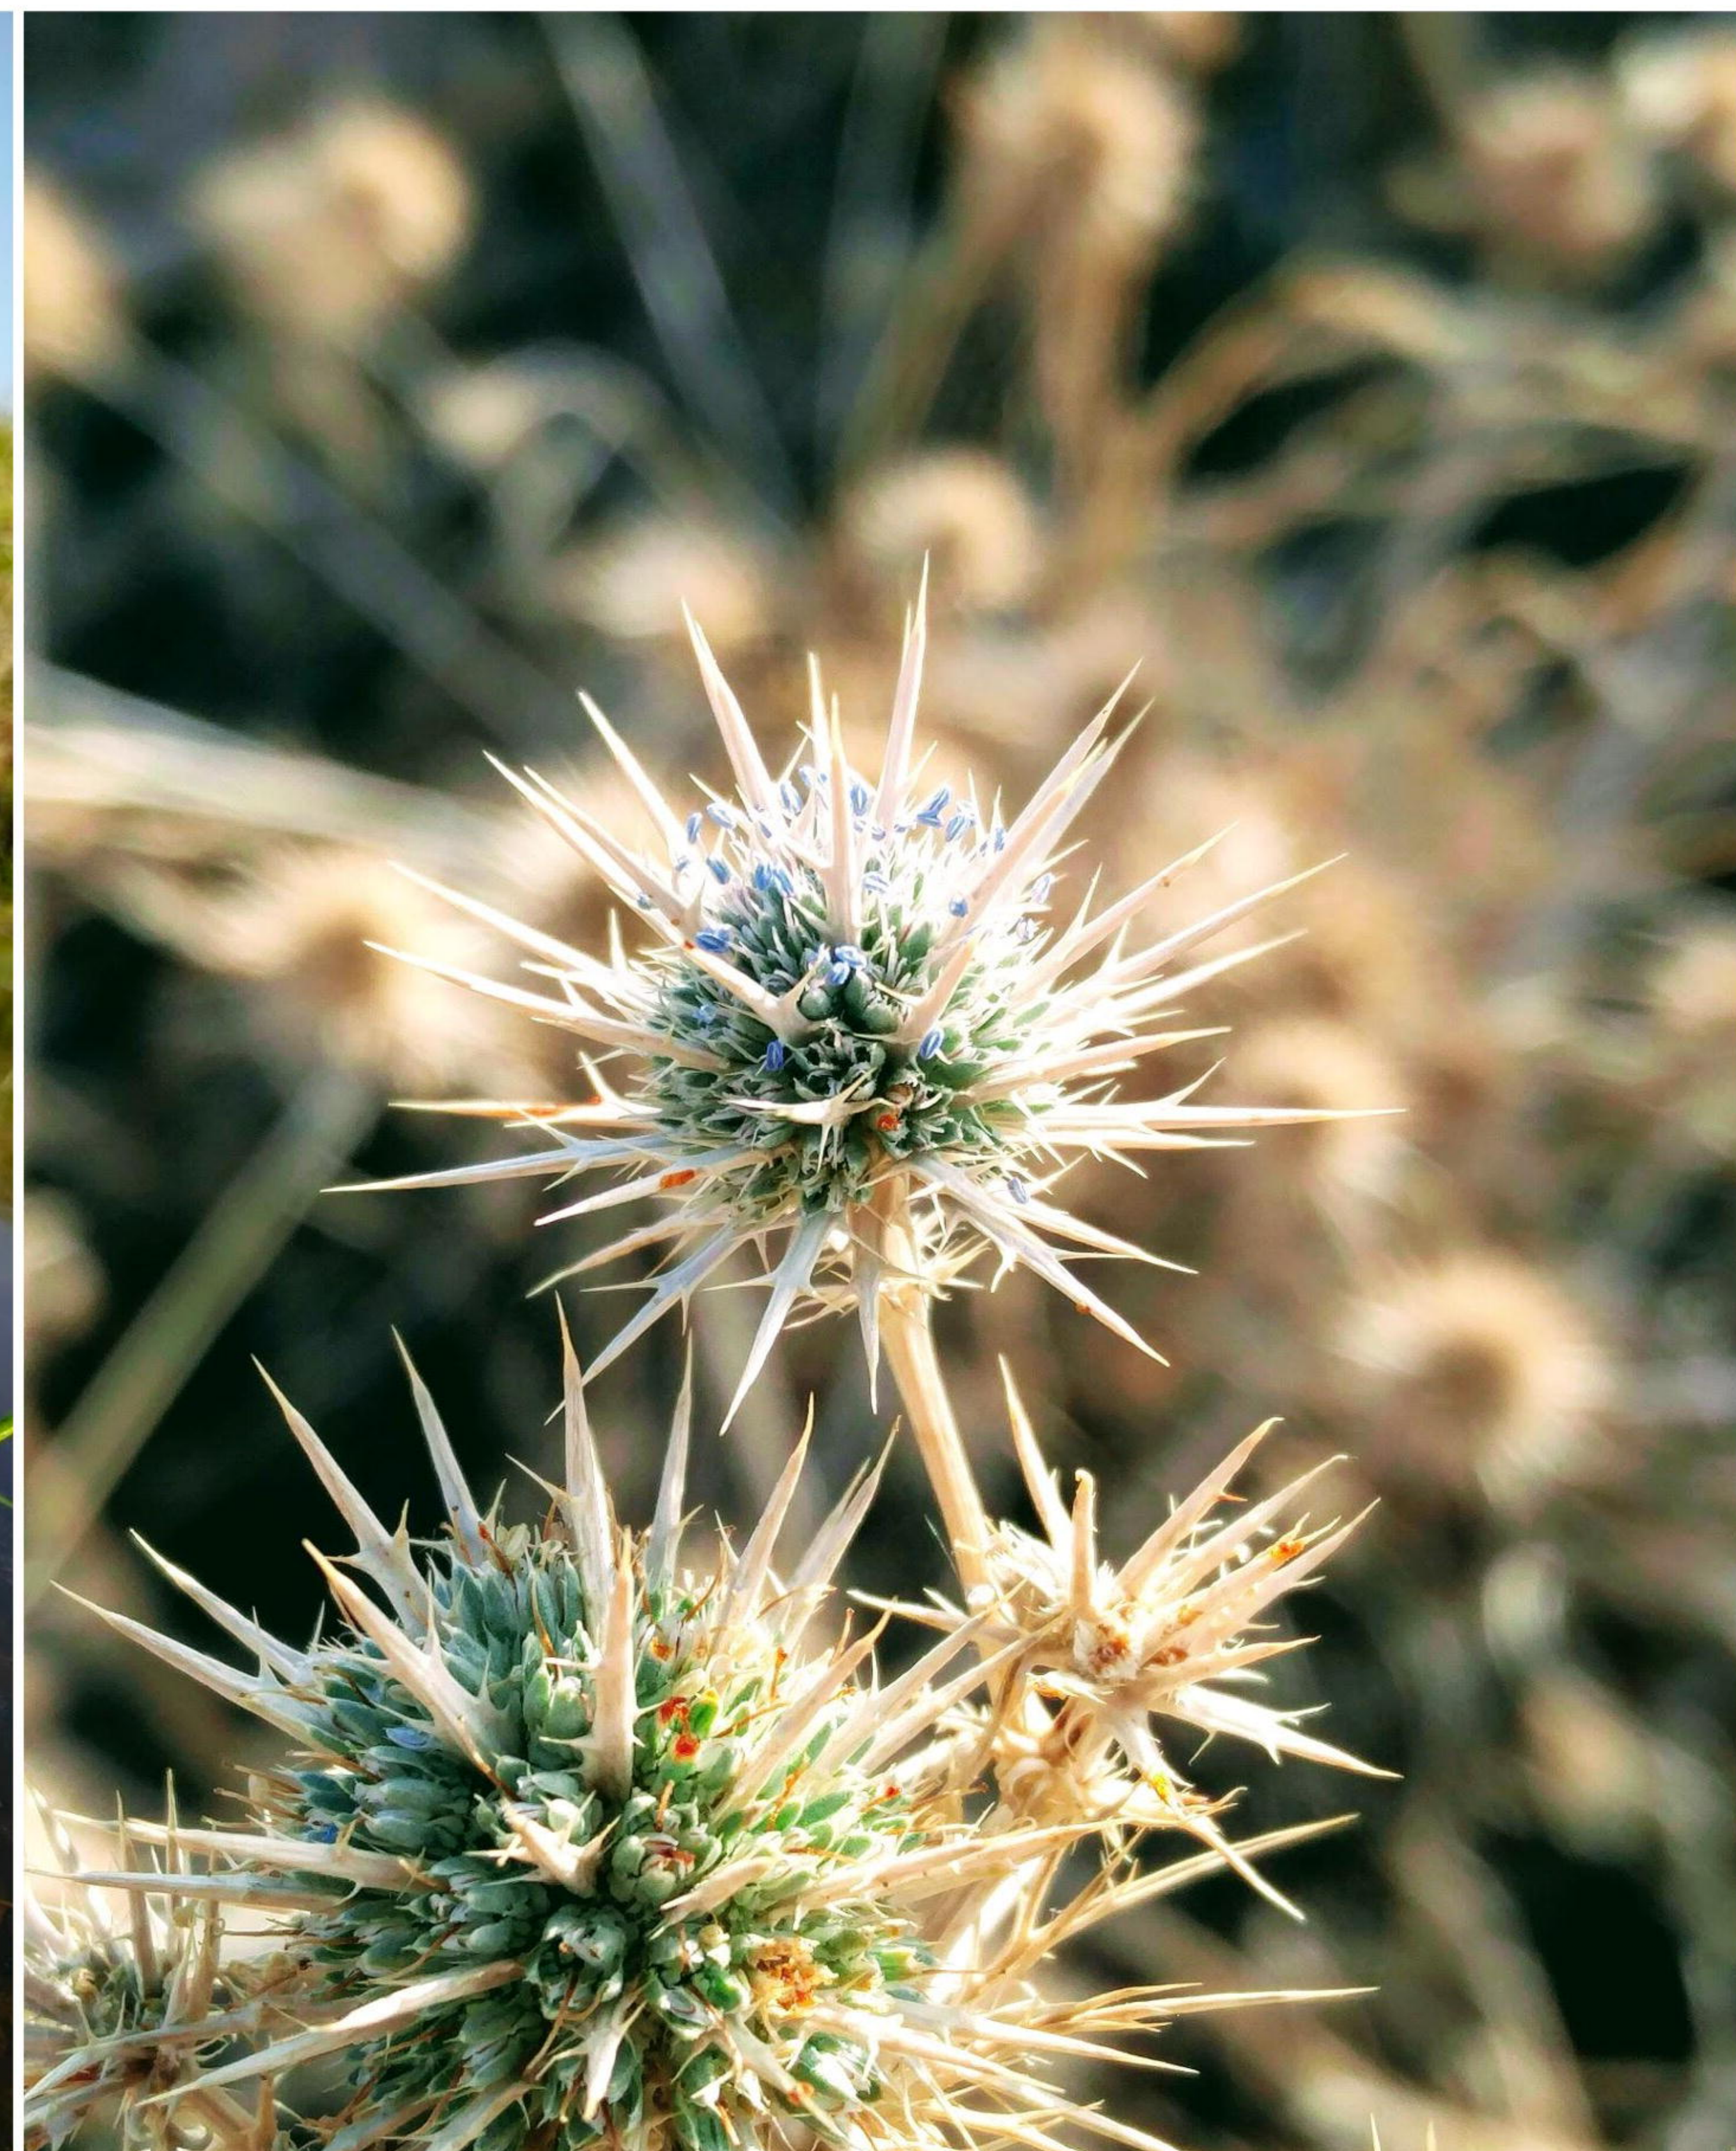

**Figure 1.** *Eryngium castrense* (Jeps.) is a California native plant, specialized to live under aquatic and desiccated environmental conditions. It grows in California vernal pools, which are temporary, Mediterranean-climate wetlands **(A)** “Isoetoide” aquatic morphology; **(B)** terrestrial morphology - “Spiny” weed.



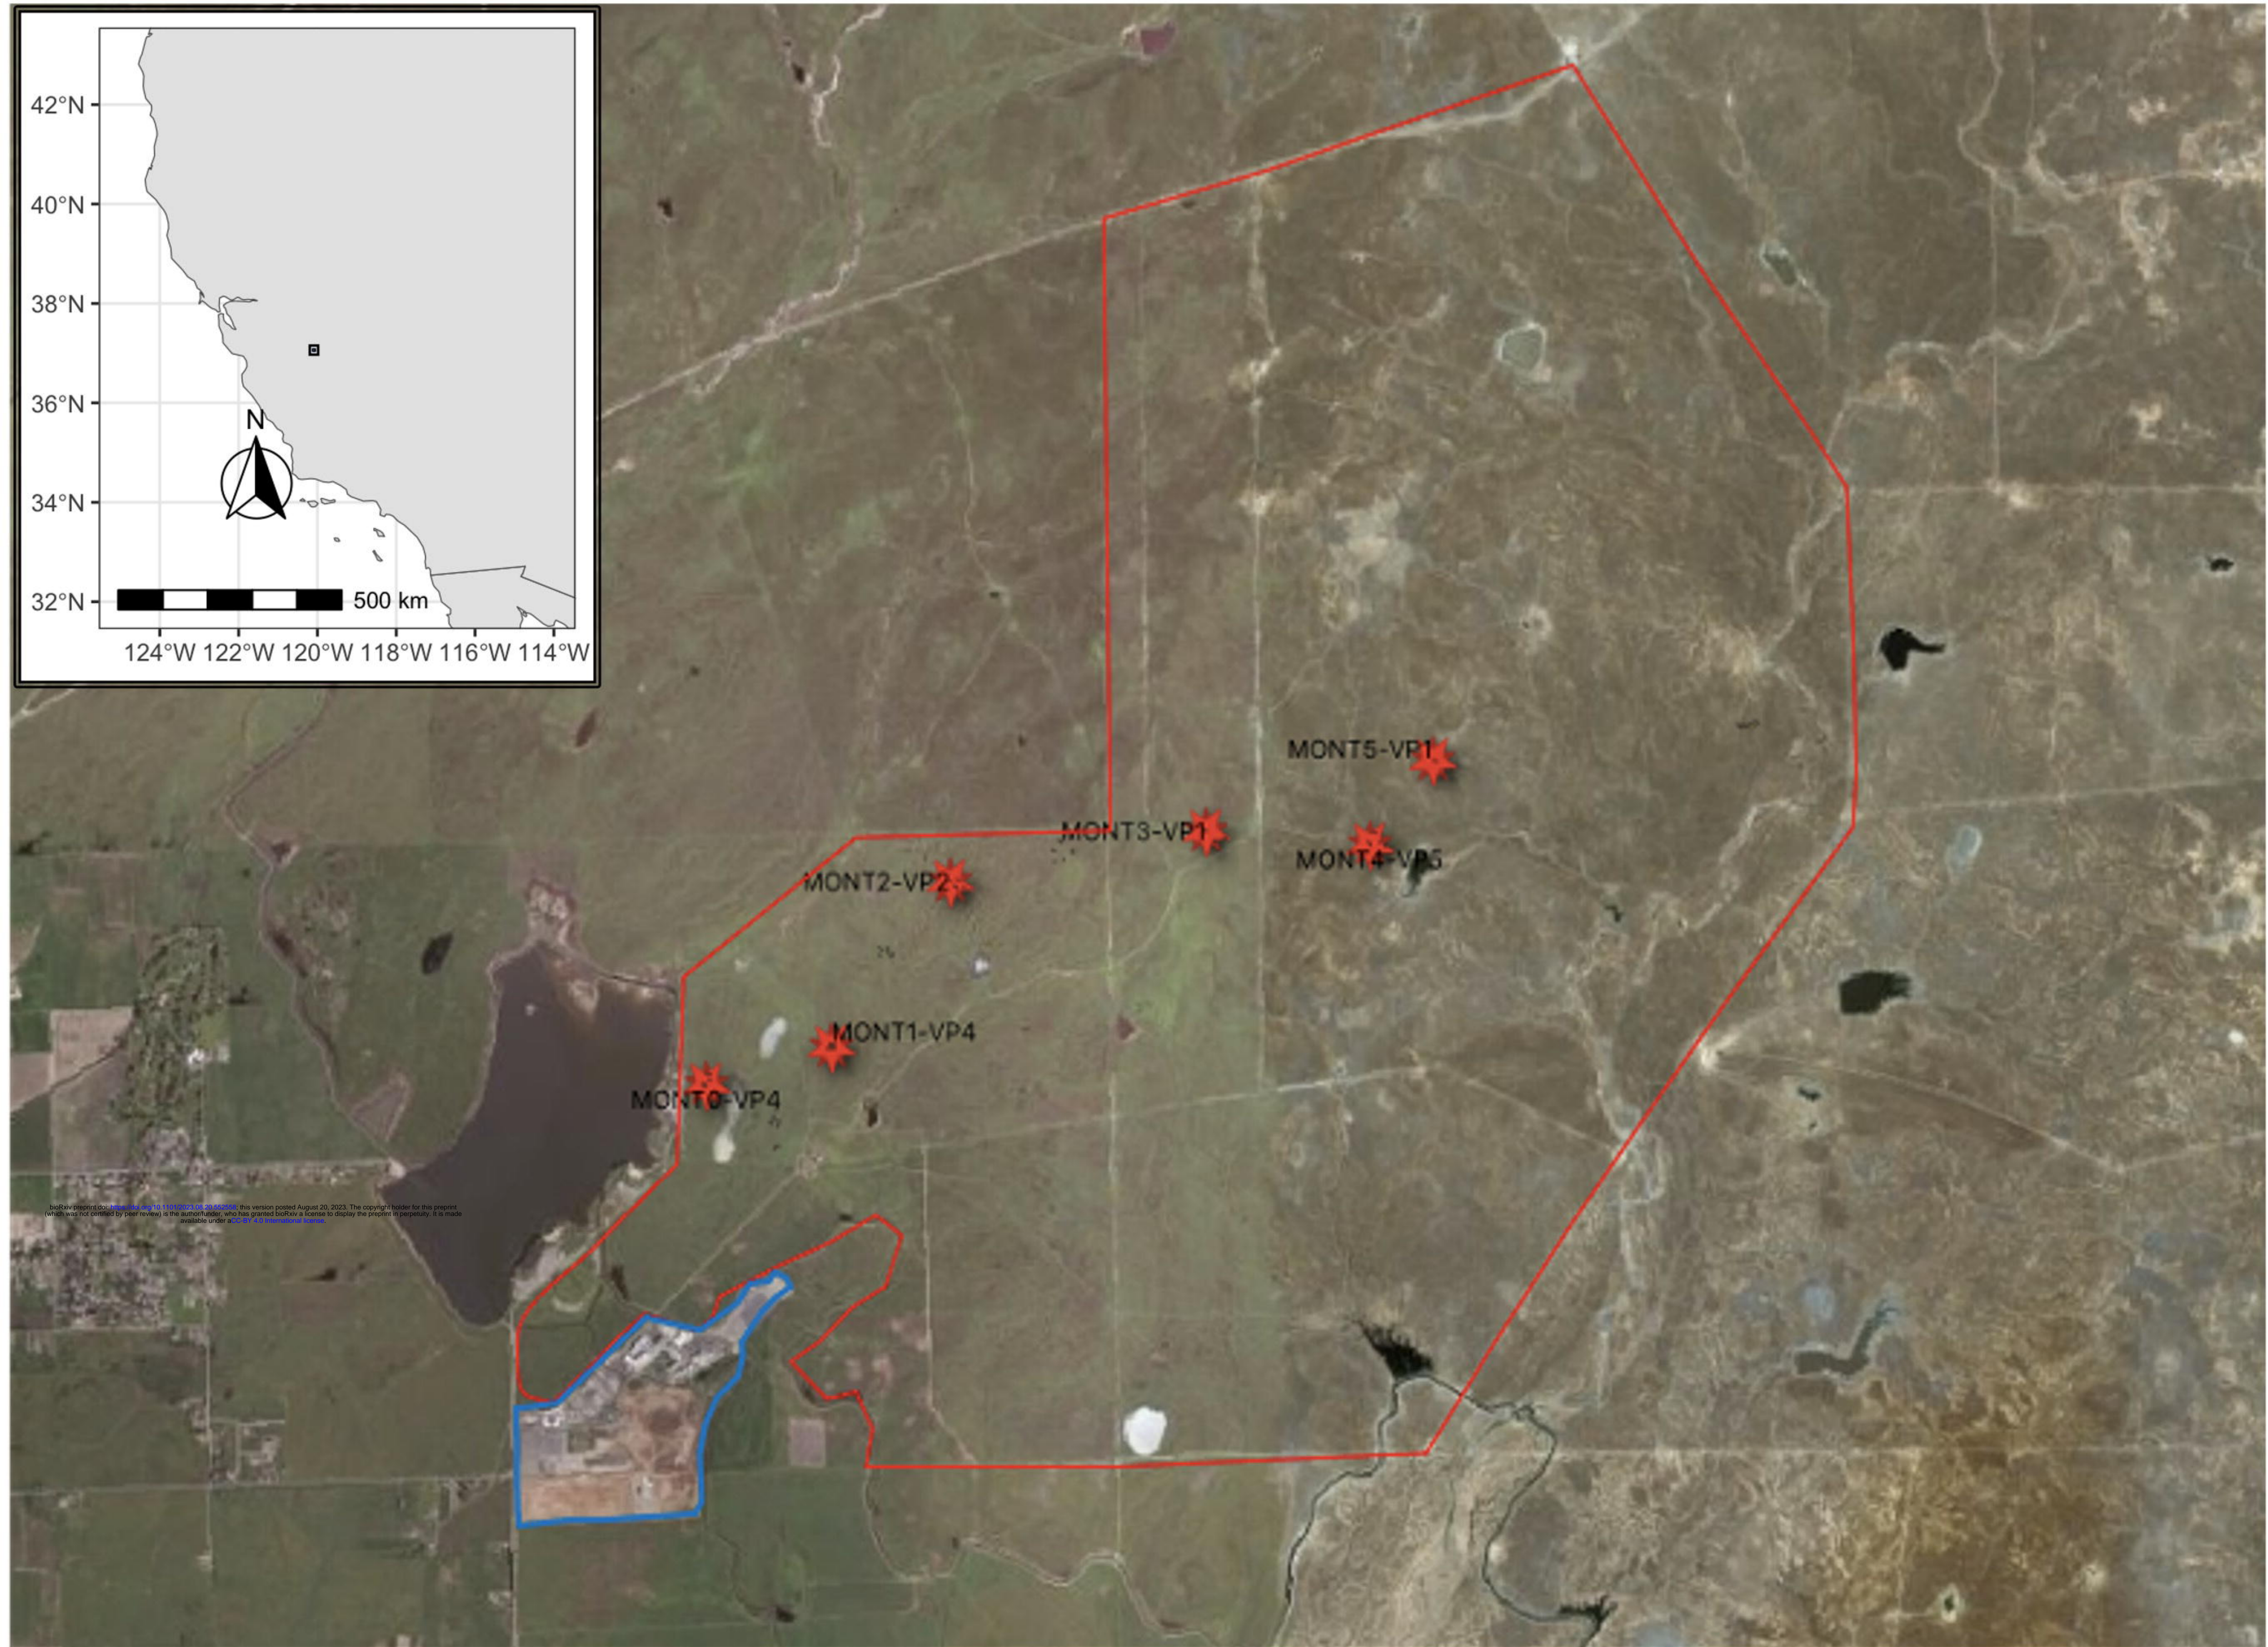

**Figure 2.** Map of the study site. UC-Merced Vernal Pools and Grassland Reserve (MVPGR) is delimited by the red polygon. The reserve is adjacent to the University of California campus, delimited with a blue polygon. Red marks indicate the location of vernal pools monitored for the studied microbes.



# Dominant Phyla

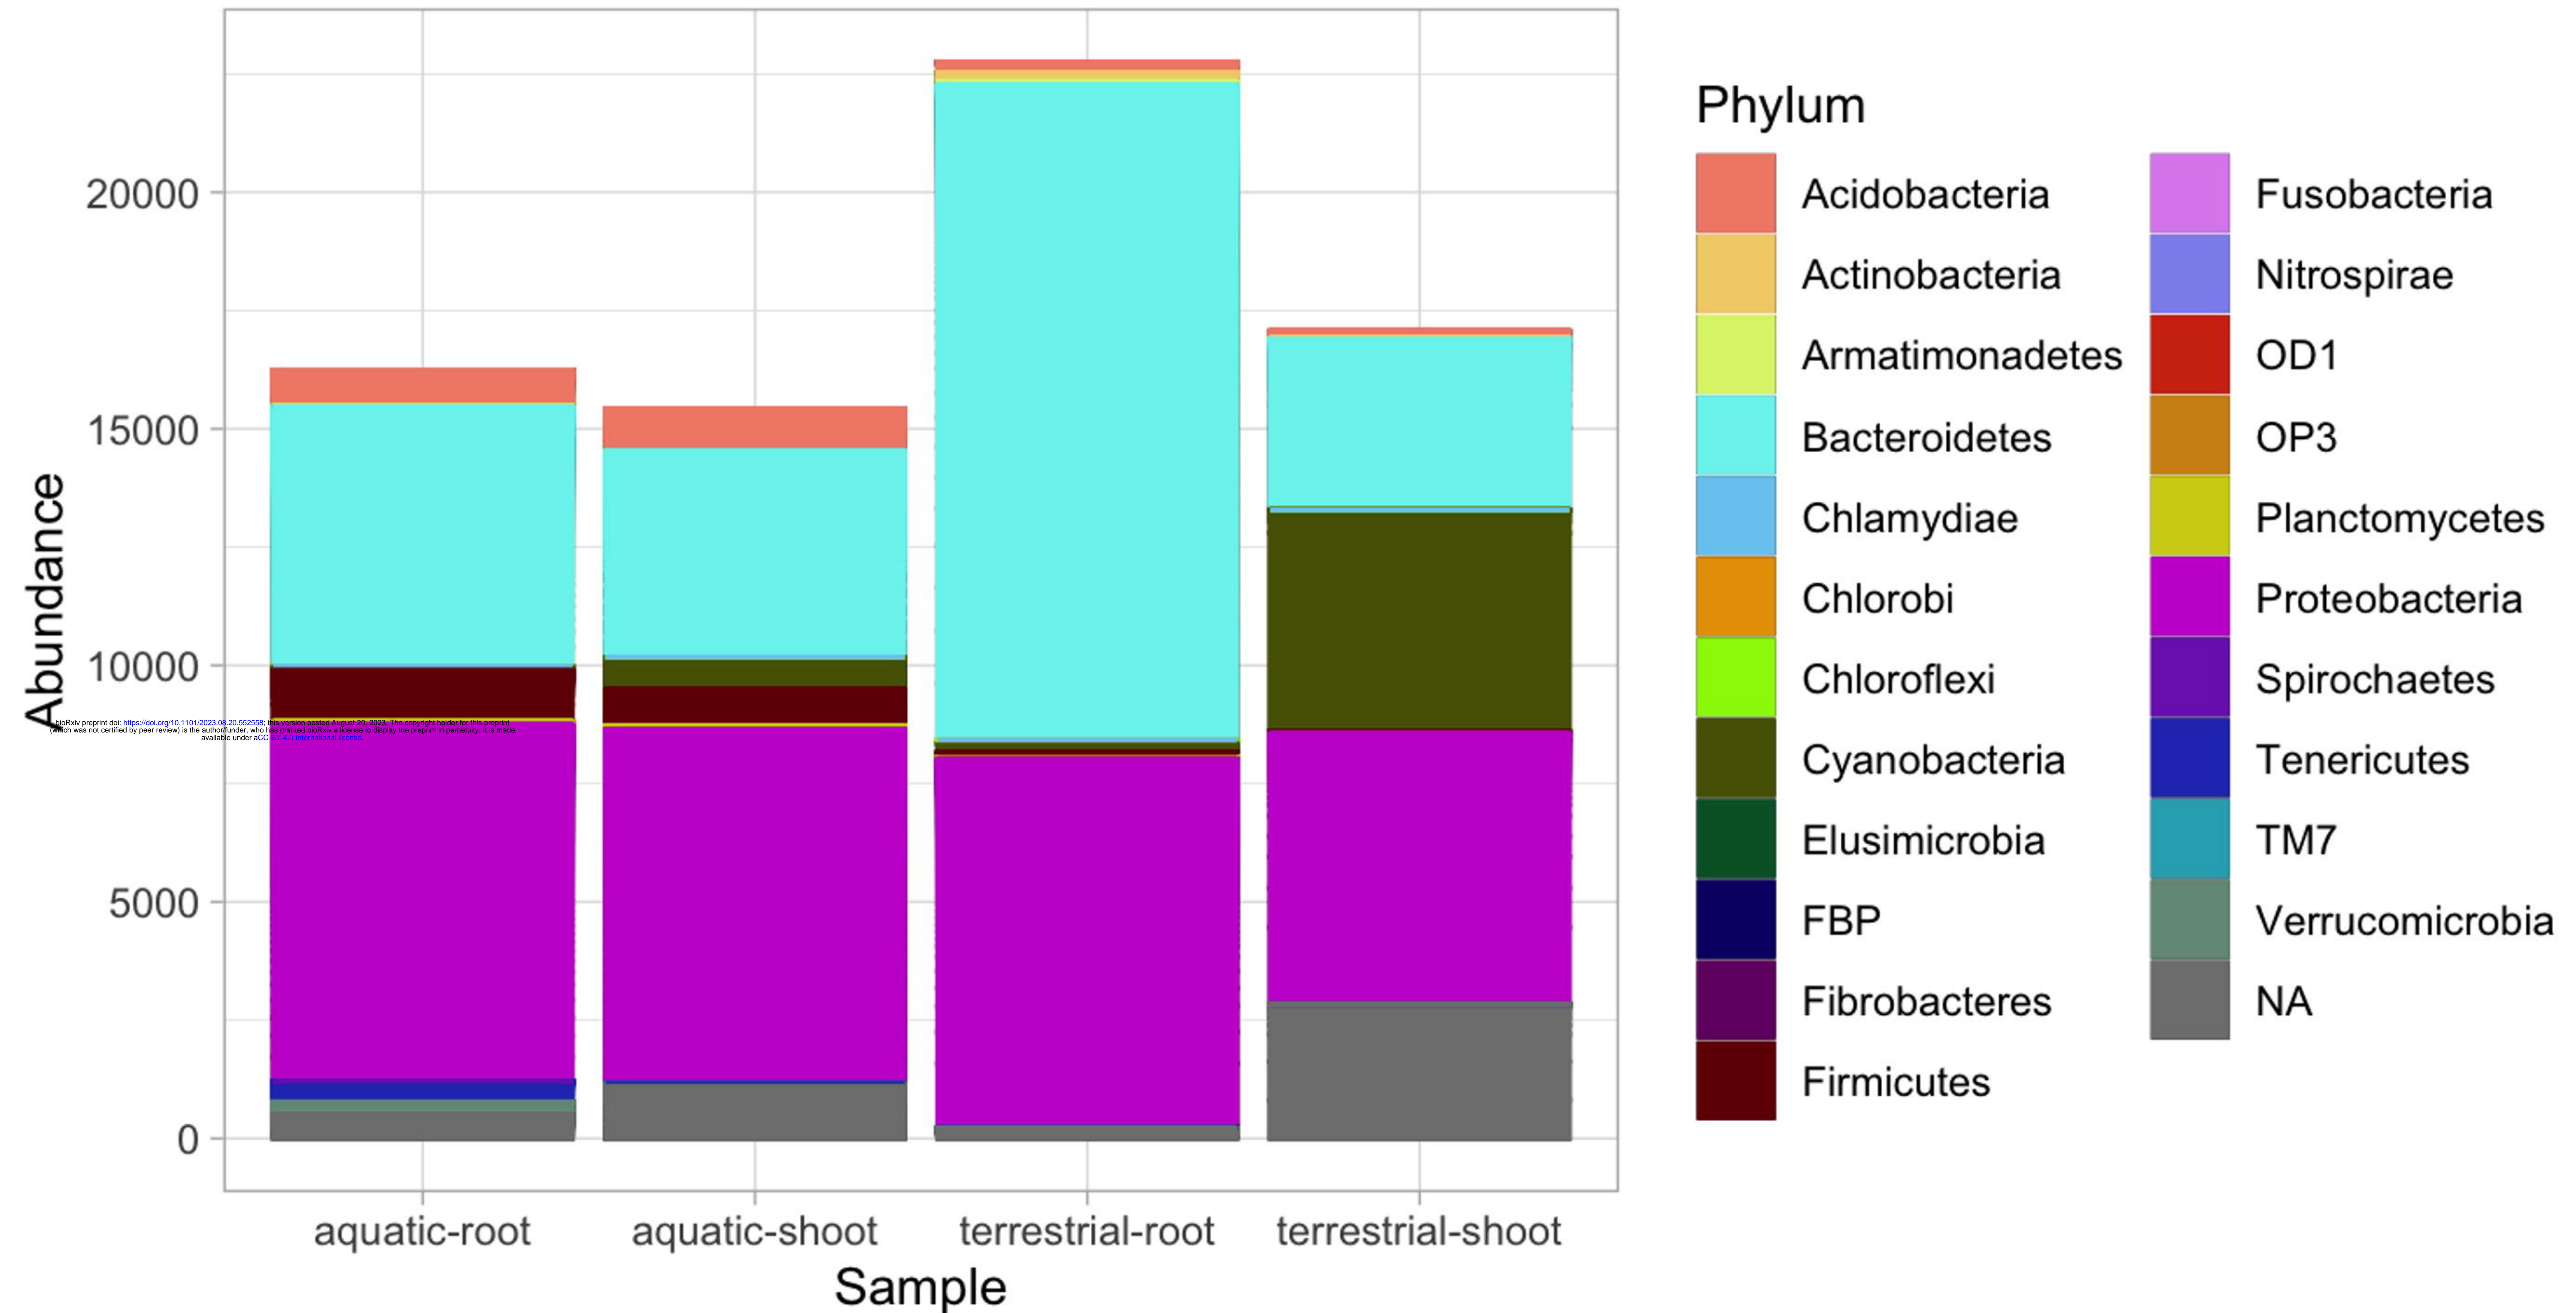

Figure 3. Dominant bacterial phyla in the amphibious plant *E. castrense*.



# Bray-Curtis dissimilarity

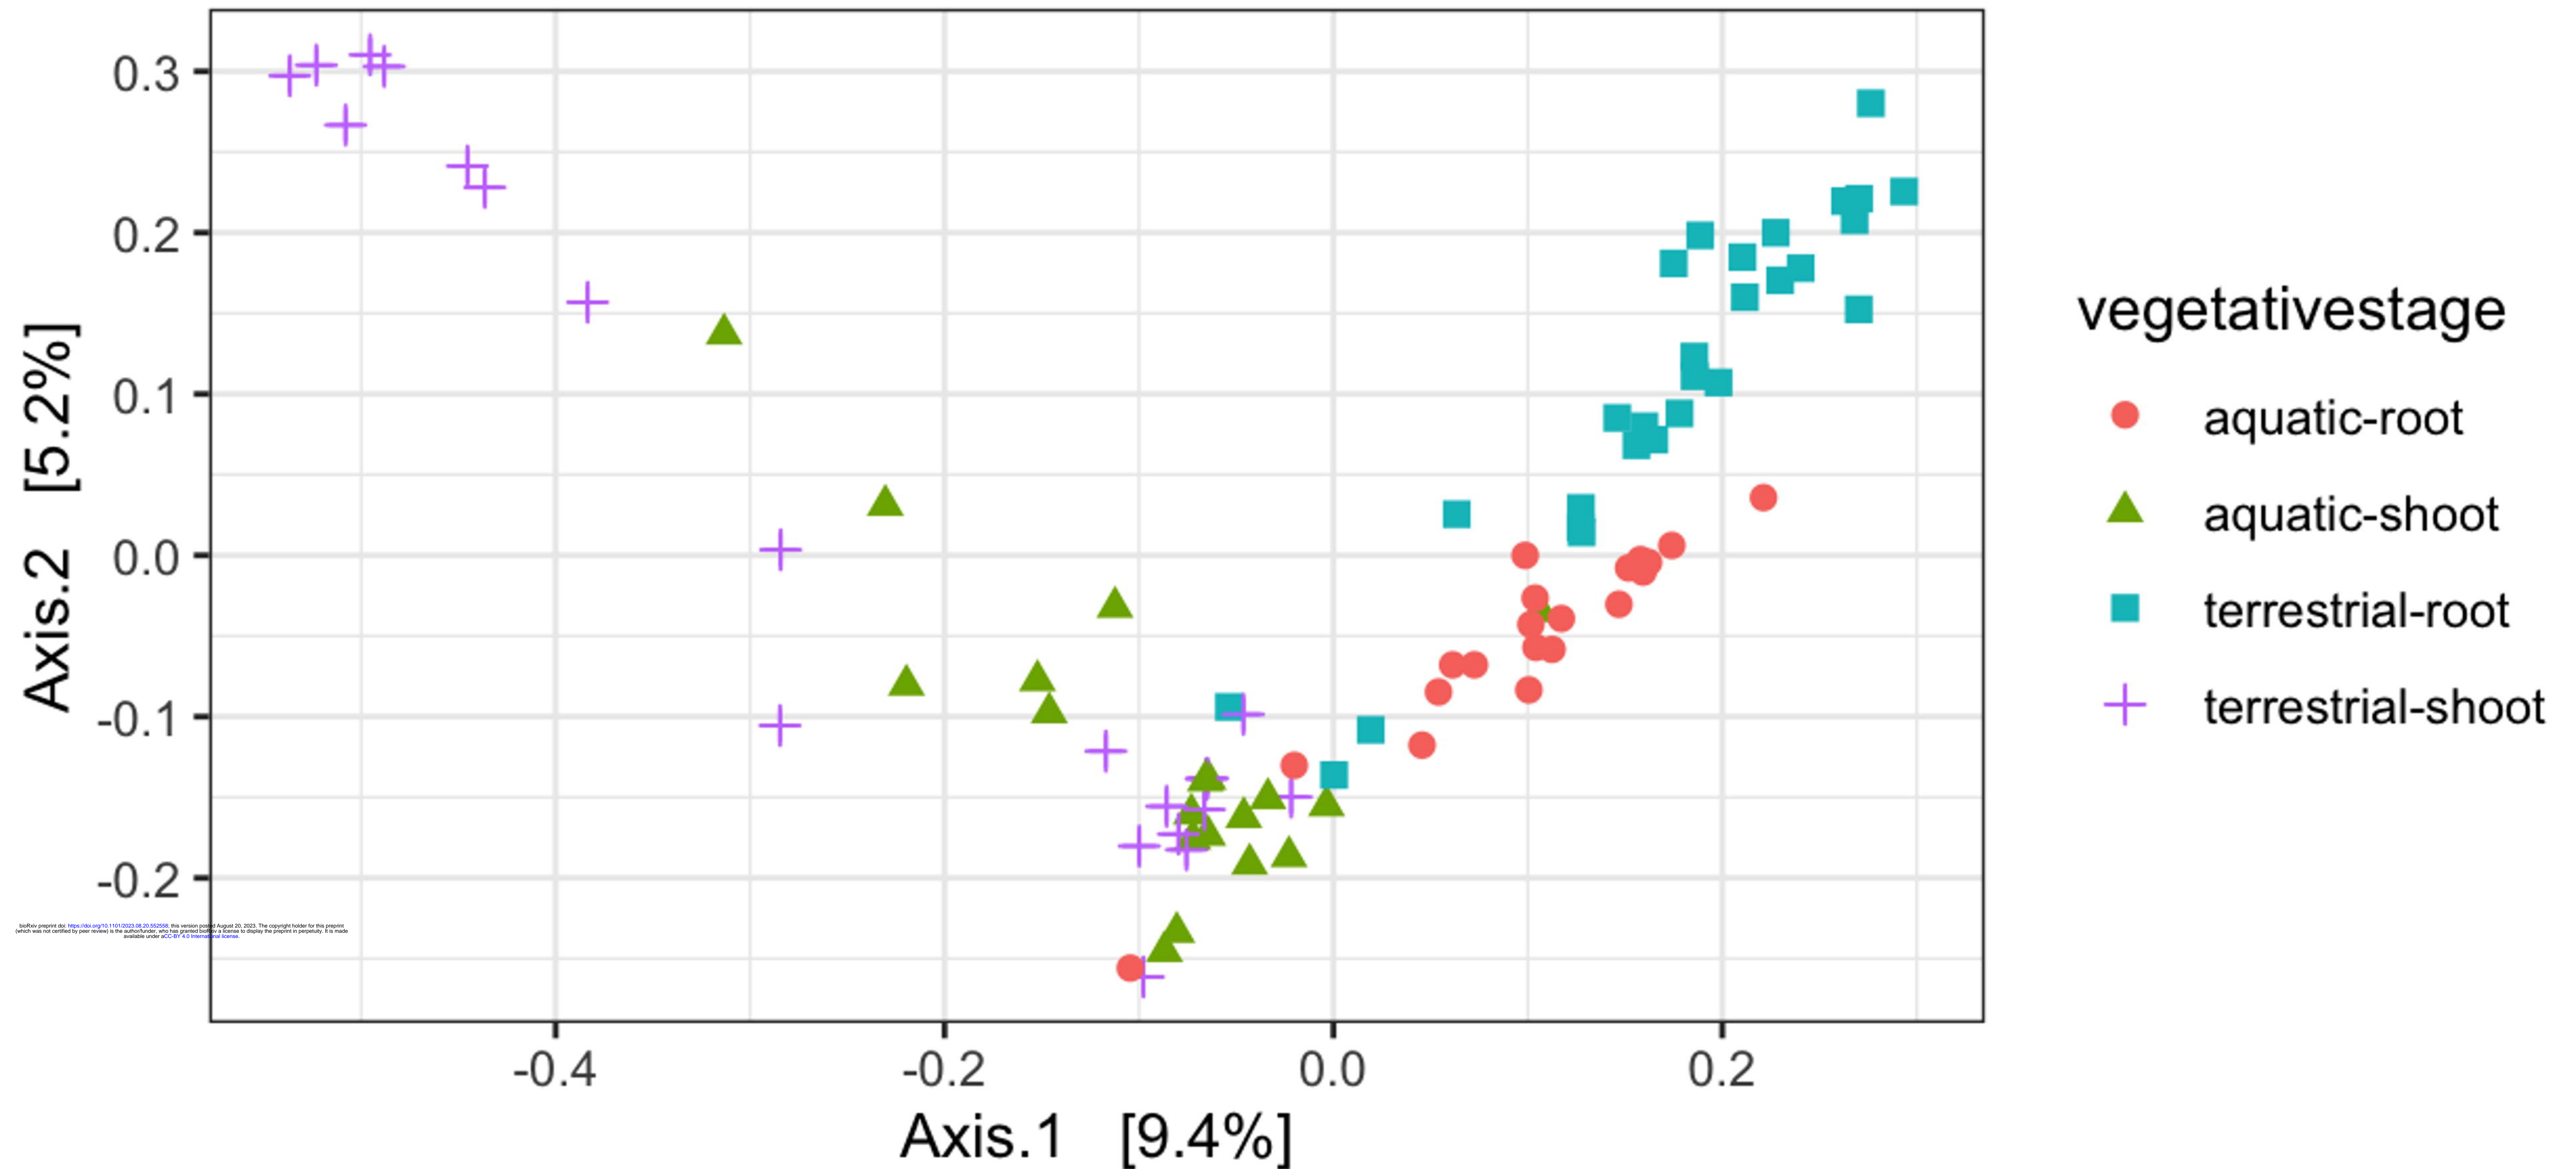

**Figure 4.** Principal Components Analysis (Bray-Curtis distances) for bacterial communities illustrates differences among plant compartments, as well as aquatic versus terrestrial phase. Samples are grouped and color shaded based on the combination of these factors.



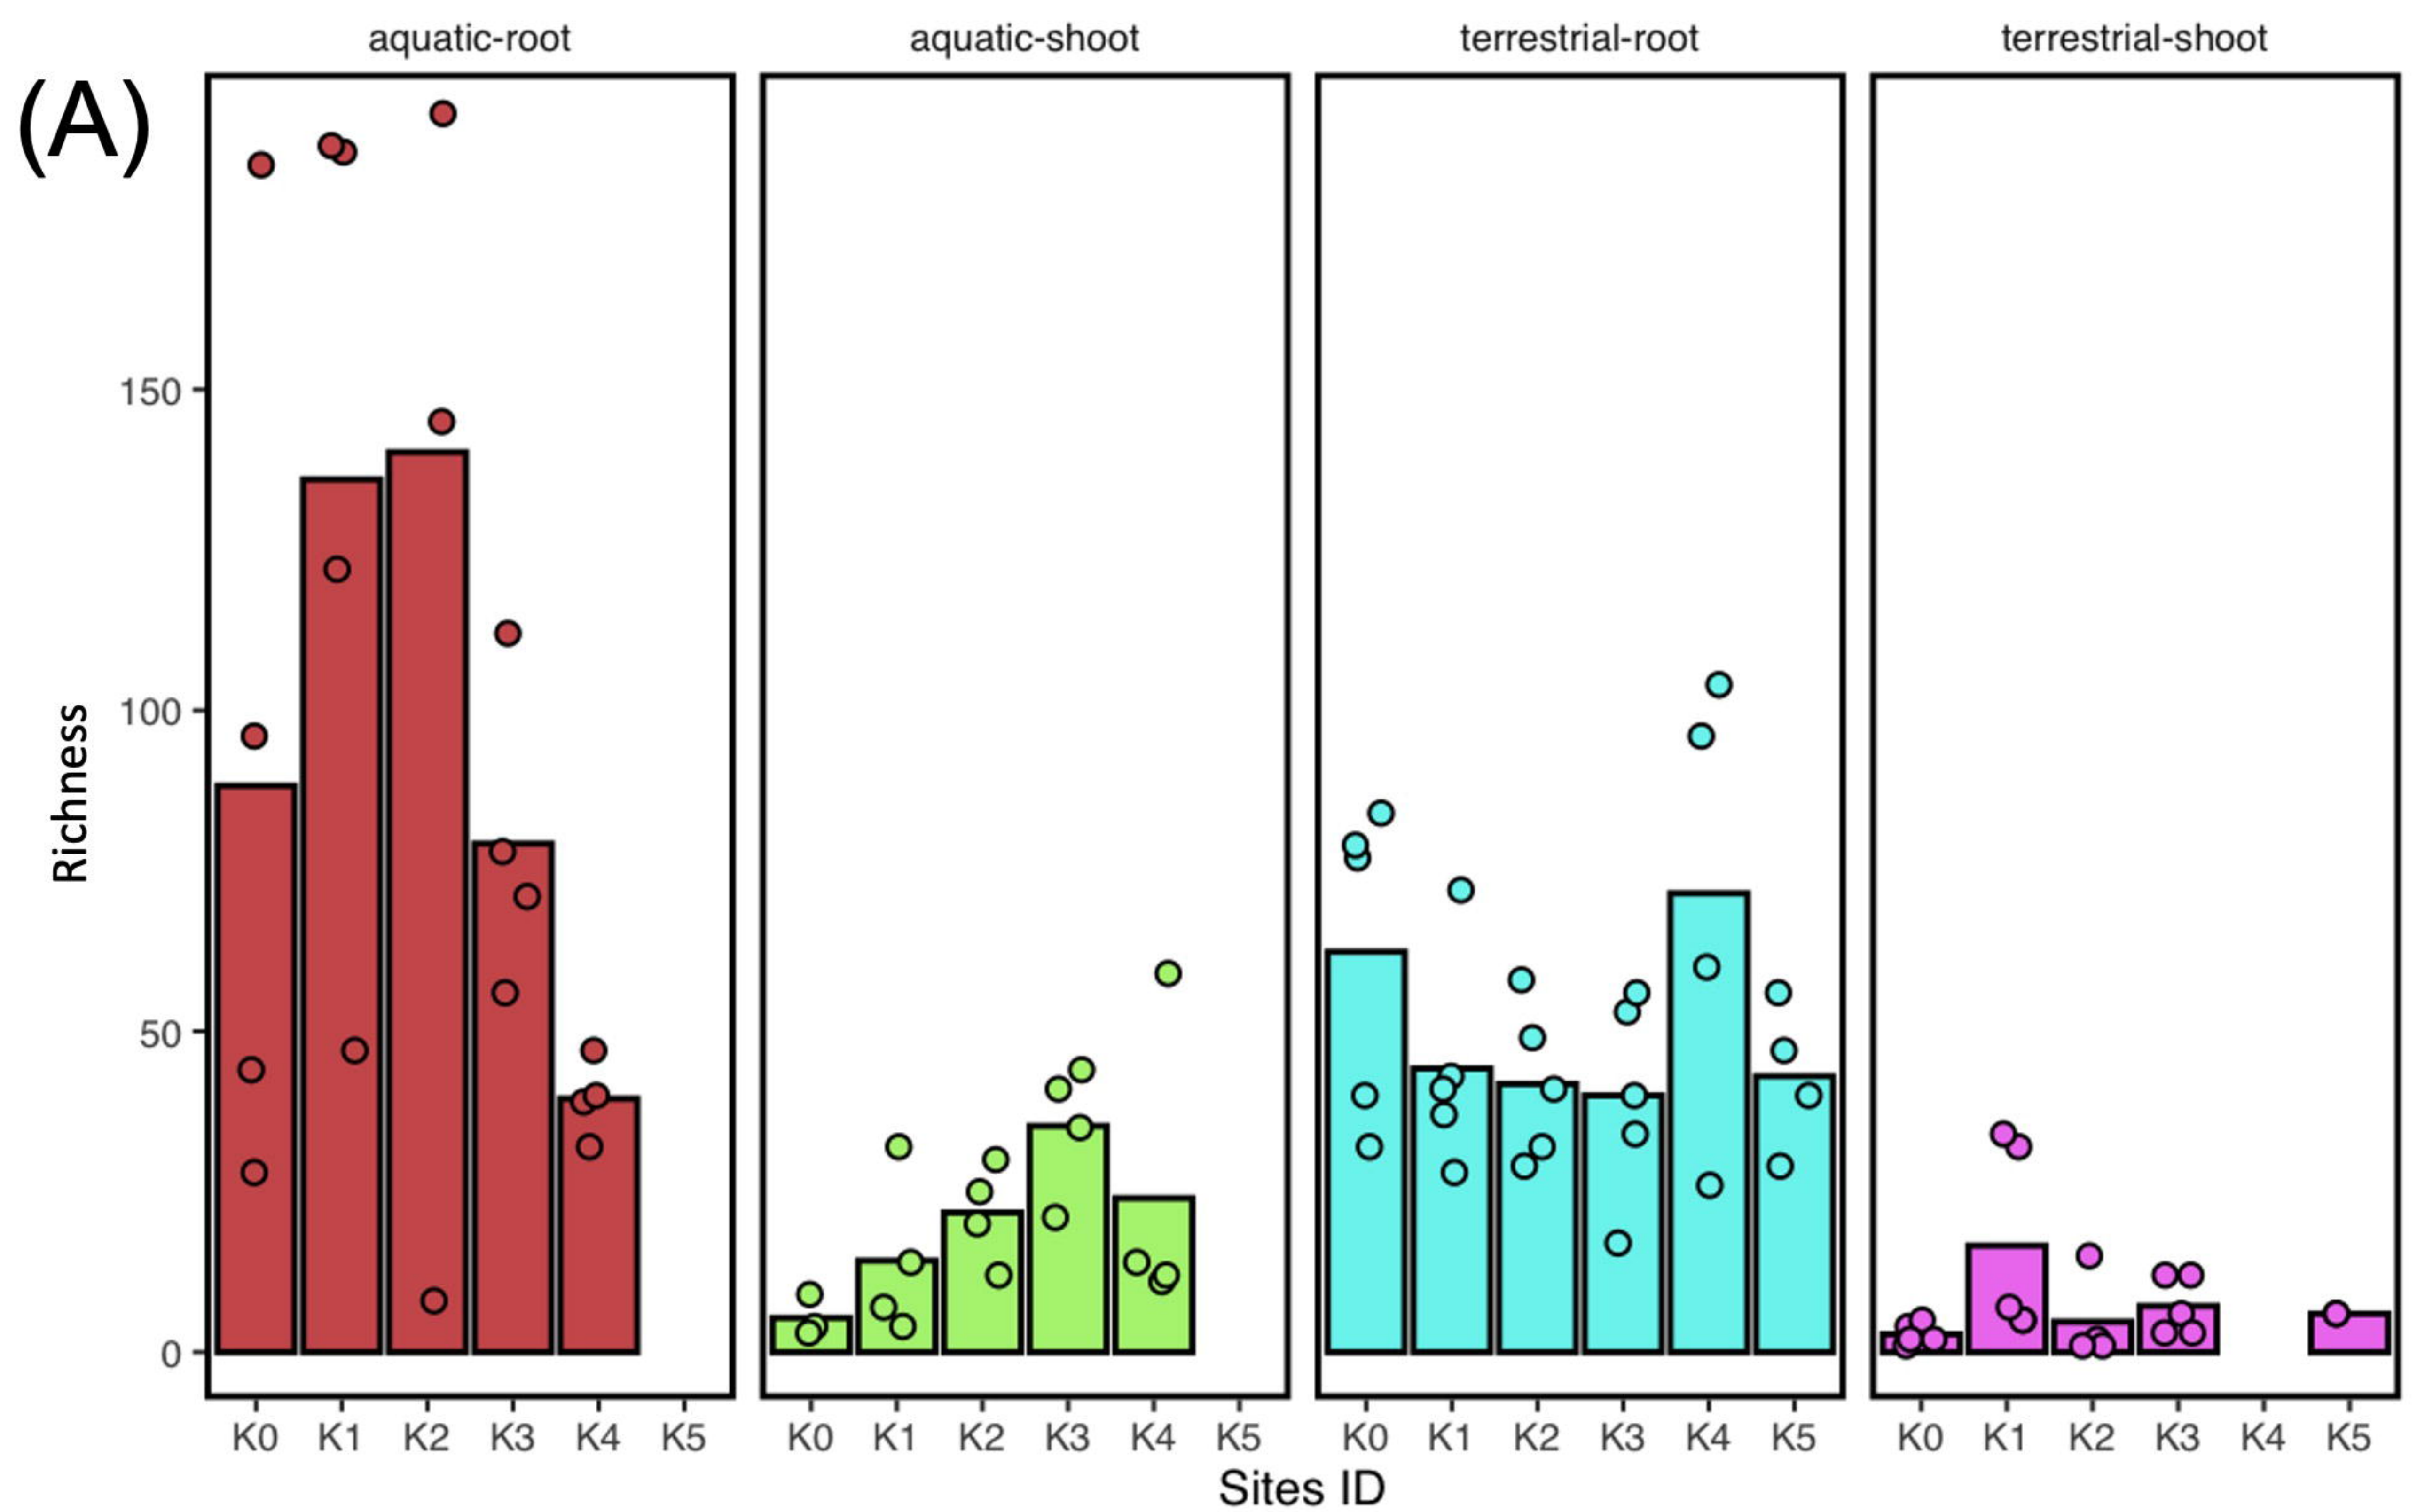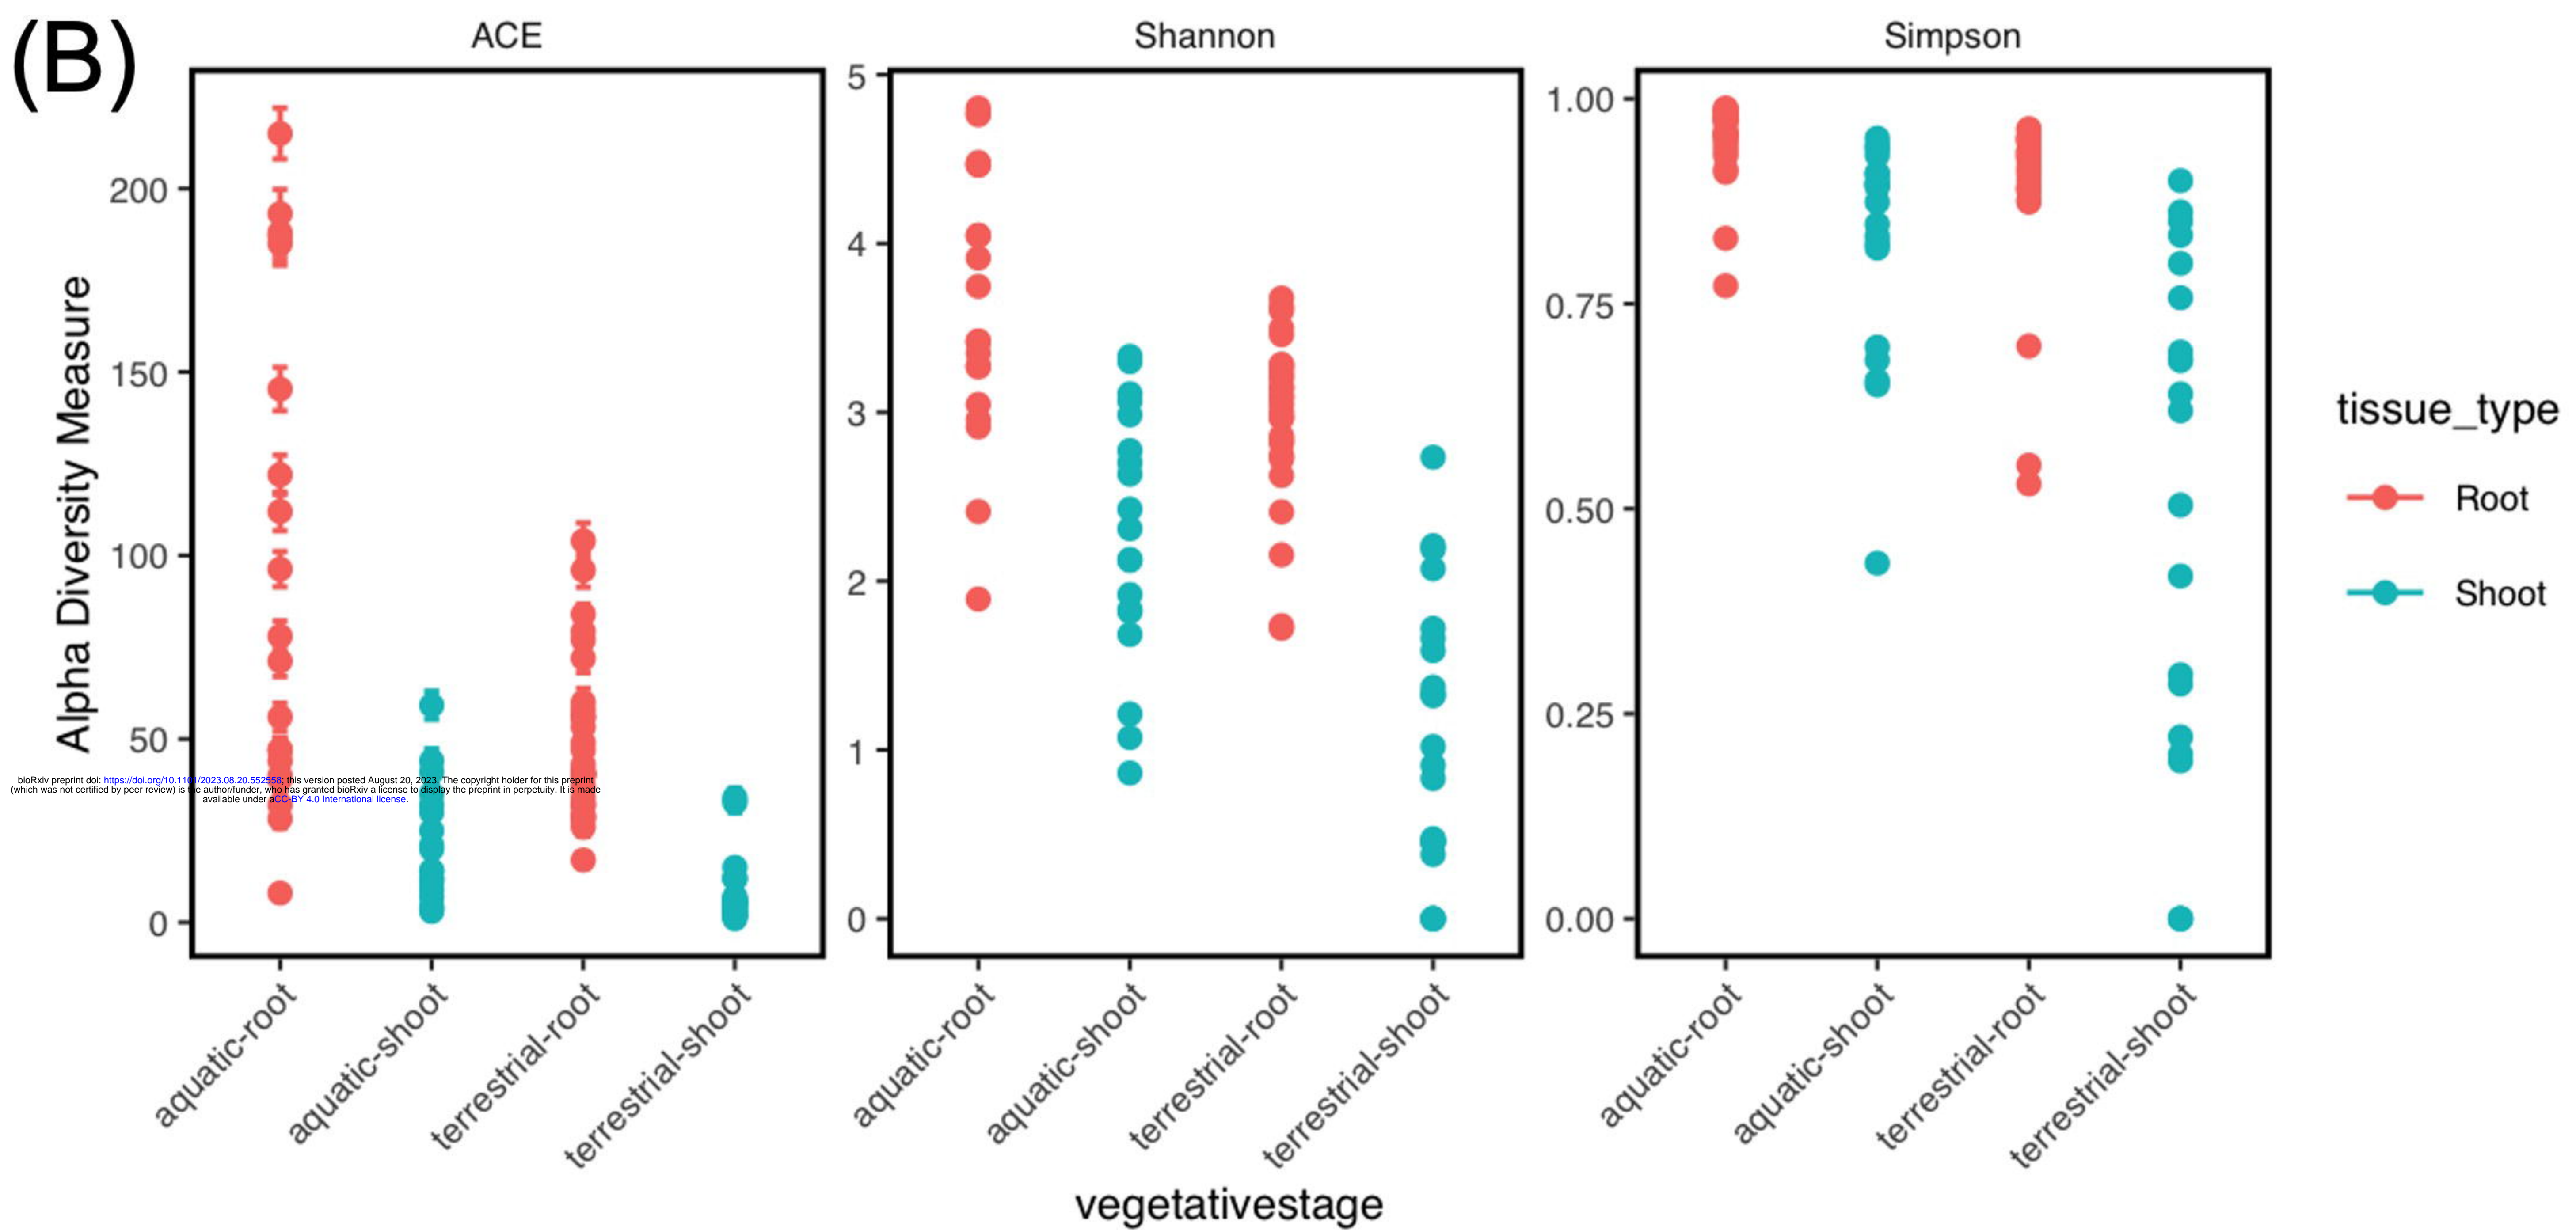

**Figure 5.** Alpha diversity in aquatic and terrestrial roots and shoots. **(A)** Differences in endophytic taxa diversity. Bars represent the total taxa abundance across sampling sites, given a specific tissue type and plant morphological stage. **(B)** Alpha diversity metrics of roots and shoots in both, aquatic and terrestrial. Dots represent individual samples.



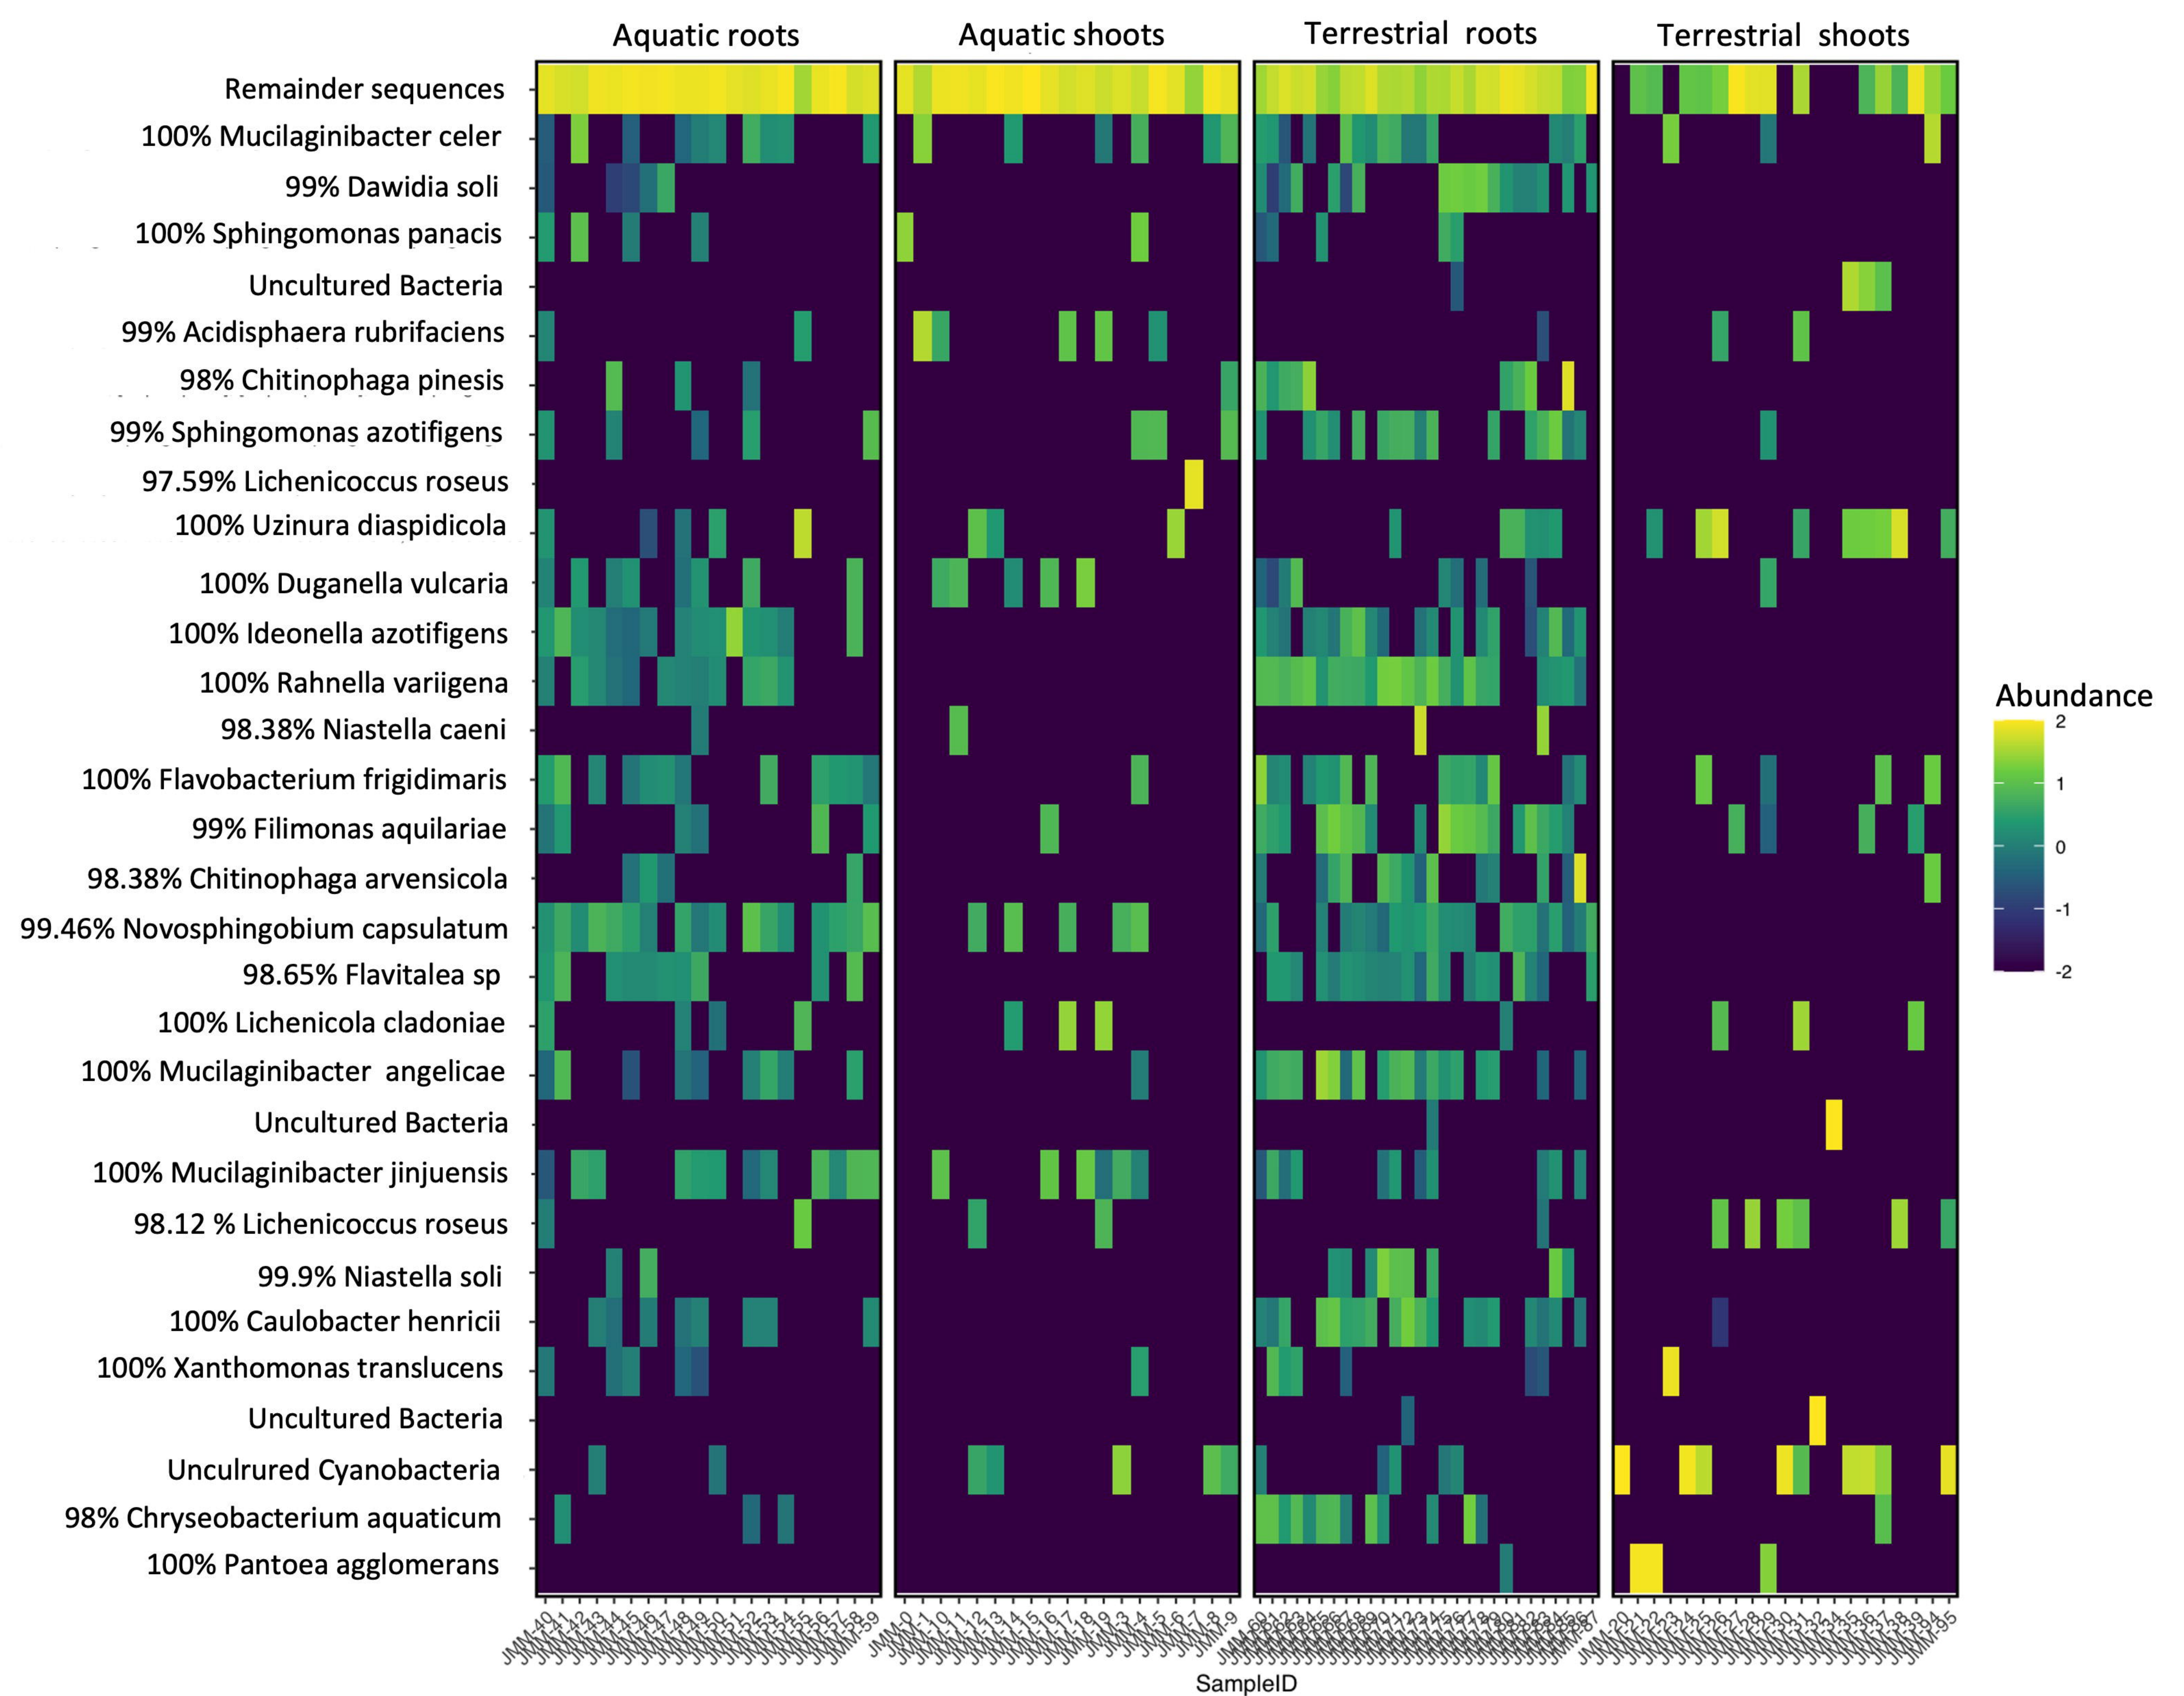

**Figure 6.** Heat map displaying the relative abundance of the 30 most abundant endophytic ASVs identified for the amphibious plant species *E.castrense*, organized by plant compartment. Percent identity to the closest match in NCBI is shown next to the assigned taxa name.



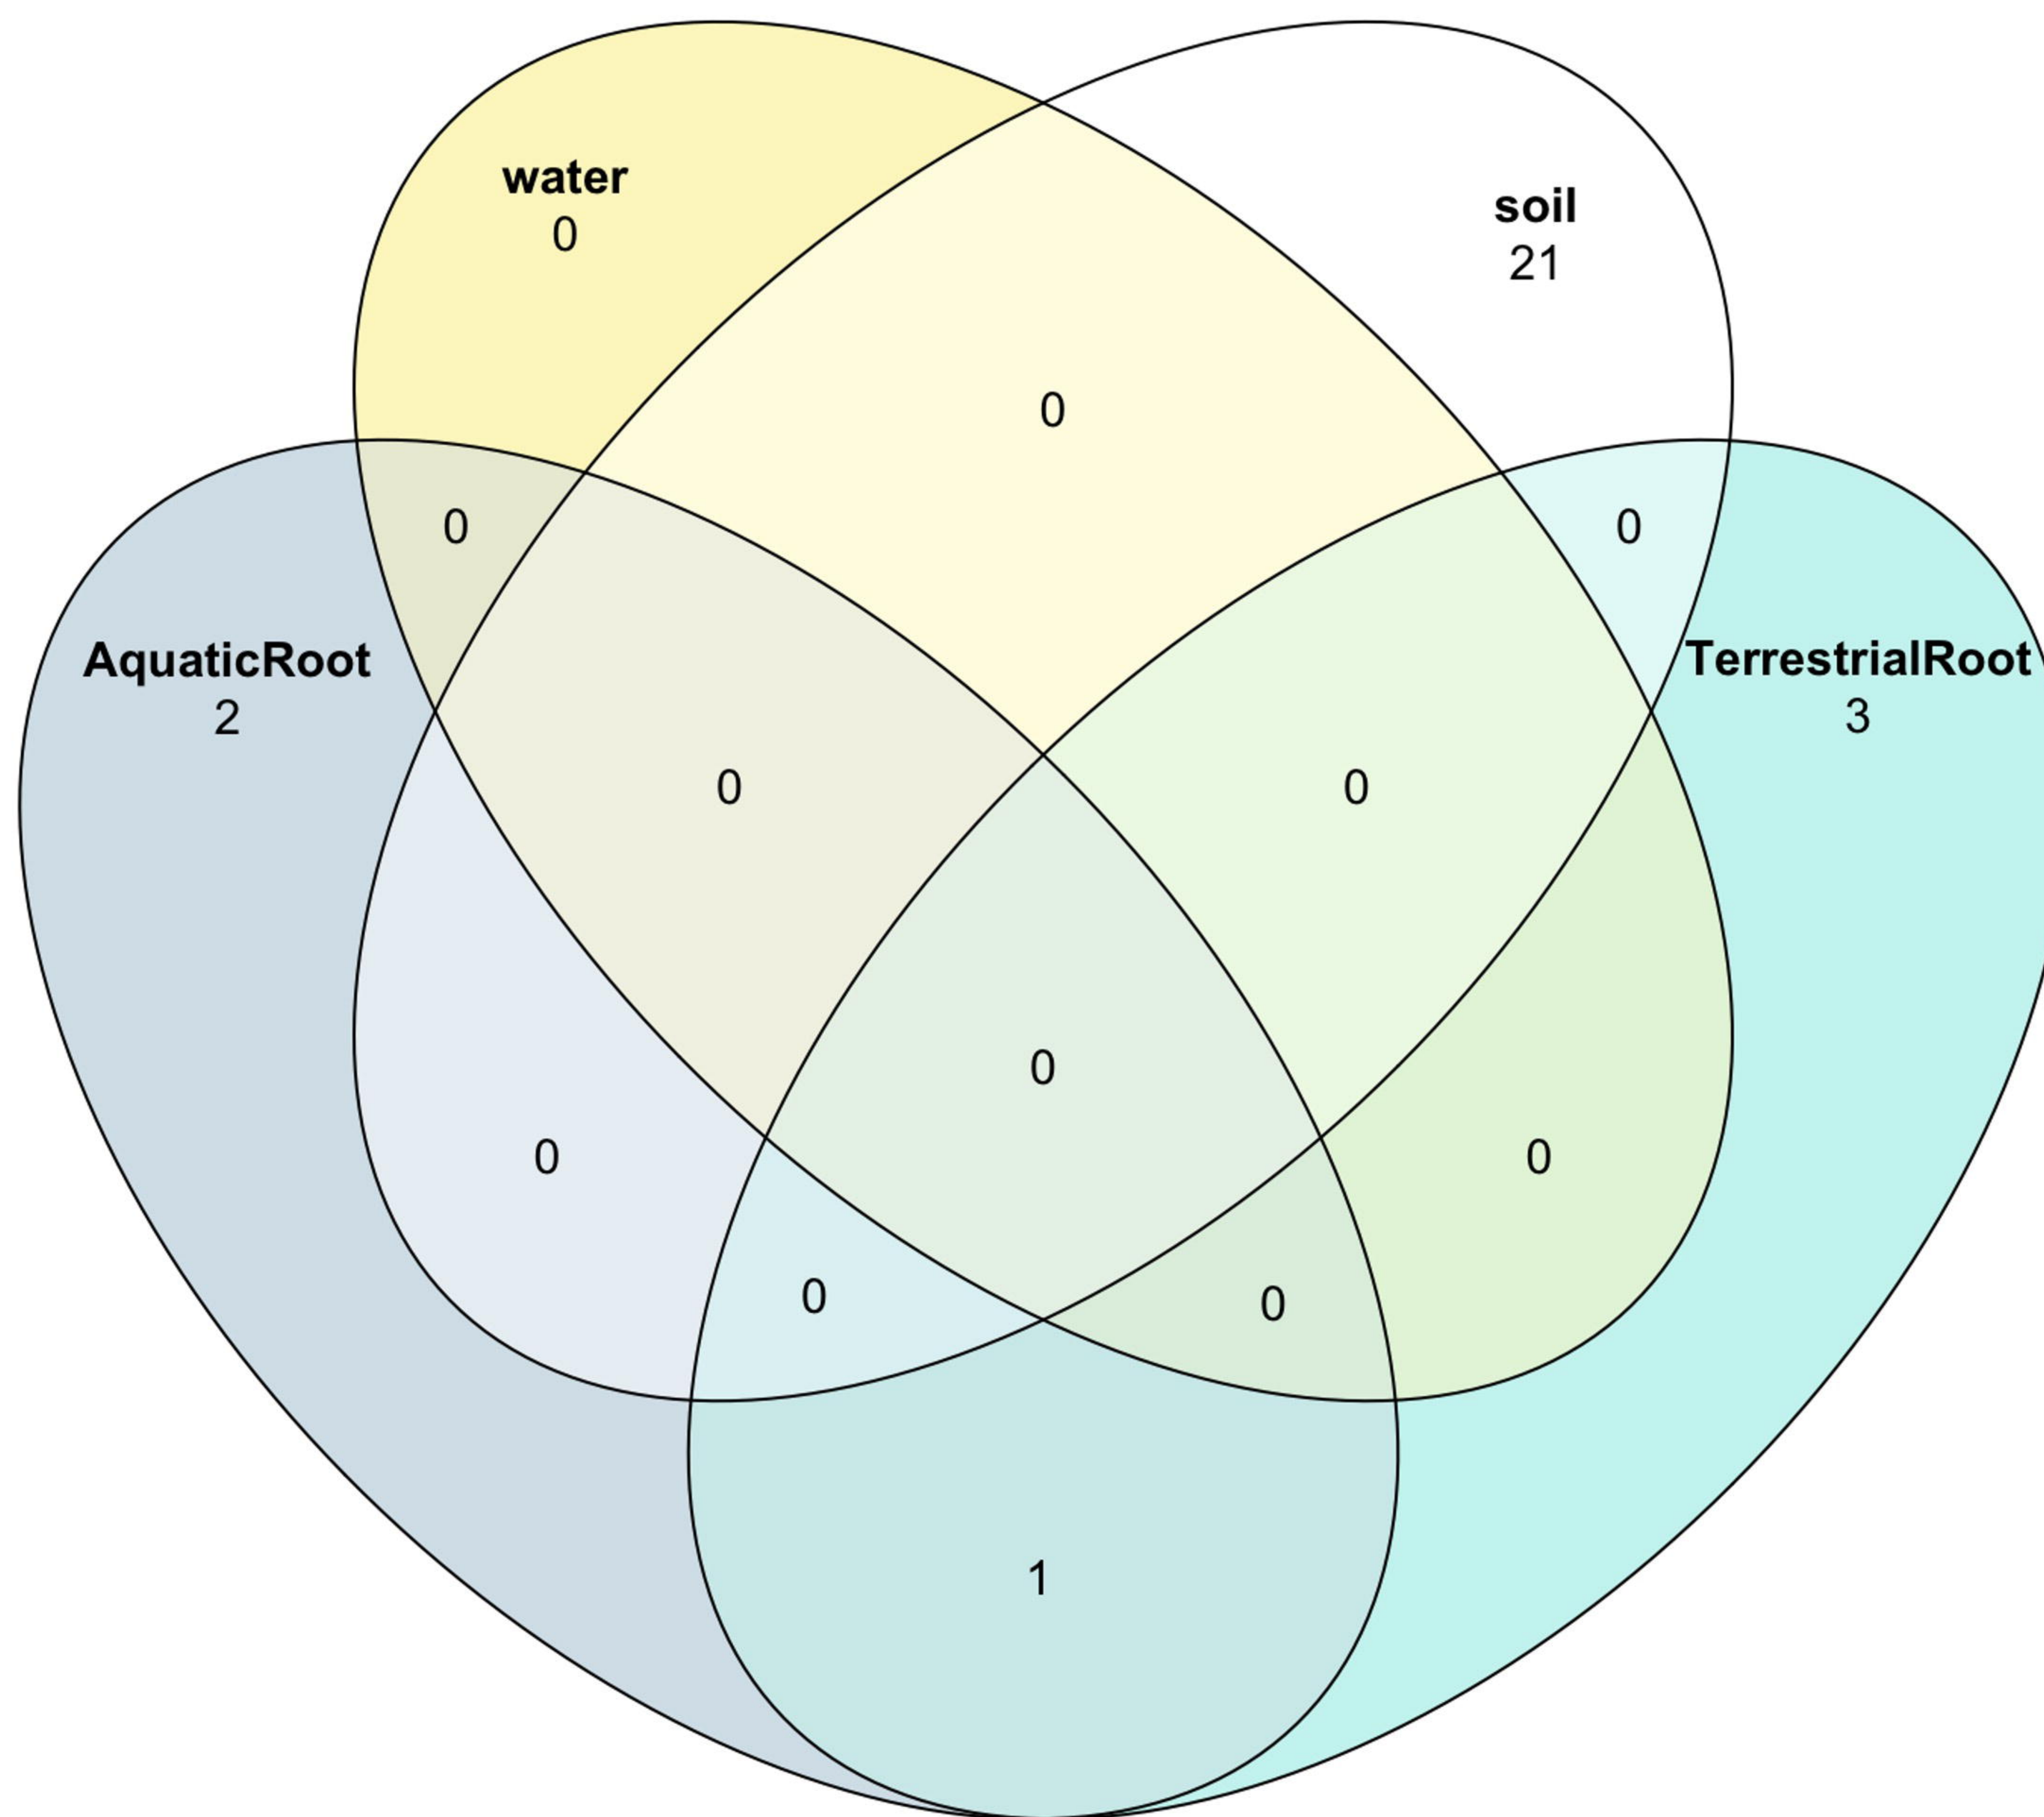

bioRxiv preprint doi: <https://doi.org/10.1101/2023.08.20.552568>; this version posted August 20, 2023. The copyright holder for this preprint (which was not certified by peer review) is the author/funder, who has granted bioRxiv a license to display the preprint in perpetuity. It is made available under aCC-BY 4.0 International license.

**Figure 7.** Overlap in core microbiome by ecosystem compartment in vernal pools.



## Supplementary Material

### The microbiome of an amphibious plant shifts dramatically across the host life cycle.

*Jorge A Mandussí Montiel-Molina\**, *Jason P Sexton*, *J Michael Beman*, *A Carolin Frank*

\*Correspondence: Montiel-Molinia JAM  
[jmontielmolina@ucmerced.edu](mailto:jmontielmolina@ucmerced.edu)

#### 1 Supplementary Tables

**Supplementary Table 1.** Mantel test of spatial distance (geo position) and diversity metrics.

| <i>Spatial distance Mantel</i> | <u>Observed</u> | <u>Shannon</u> | <u>Simpson</u> | <u>ACE</u> |
|--------------------------------|-----------------|----------------|----------------|------------|
| Statistic r                    | -0.04           | -0.04          | 0.06           | -0.04      |
| Significance                   | 0.8             | 0.8            | 0.08           | 0.8        |

**Supplementary Table 2.** PERMANOVA-ADONIS by habitat type in vernal pool ecosystems, Root endosphere versus soil and water.

Permanova-ADONIS sample dissimilarity significance

| <i>Dissimilarity method</i> | <i>Groups</i> | <i>SumsOfSq</i> | <i>MeanSqs</i> | <i>F.Model</i> | <i>R<sup>2</sup></i> | <i>Pr(&gt;F)</i> |
|-----------------------------|---------------|-----------------|----------------|----------------|----------------------|------------------|
| Unw-Unifrac                 | 3             | 4.05            | 1.35           | 5.77           | 0.24                 | 0.001            |
| Bray-Curtis                 | 3             | 3.8             | 1.26           | 3.38           | 0.16                 | 0.001            |

## 2 Supplementary Figures

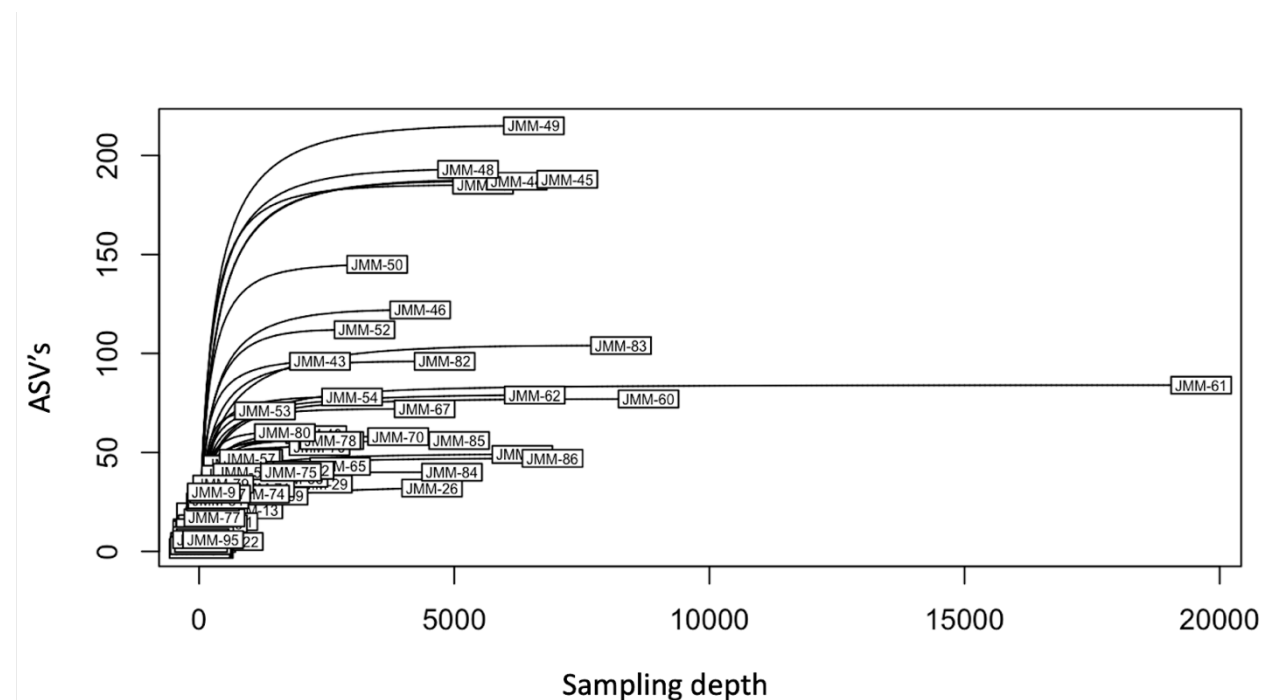

**Supplementary Figure 1.** Sequence variants (ASV's) identified by the number of ASVs.

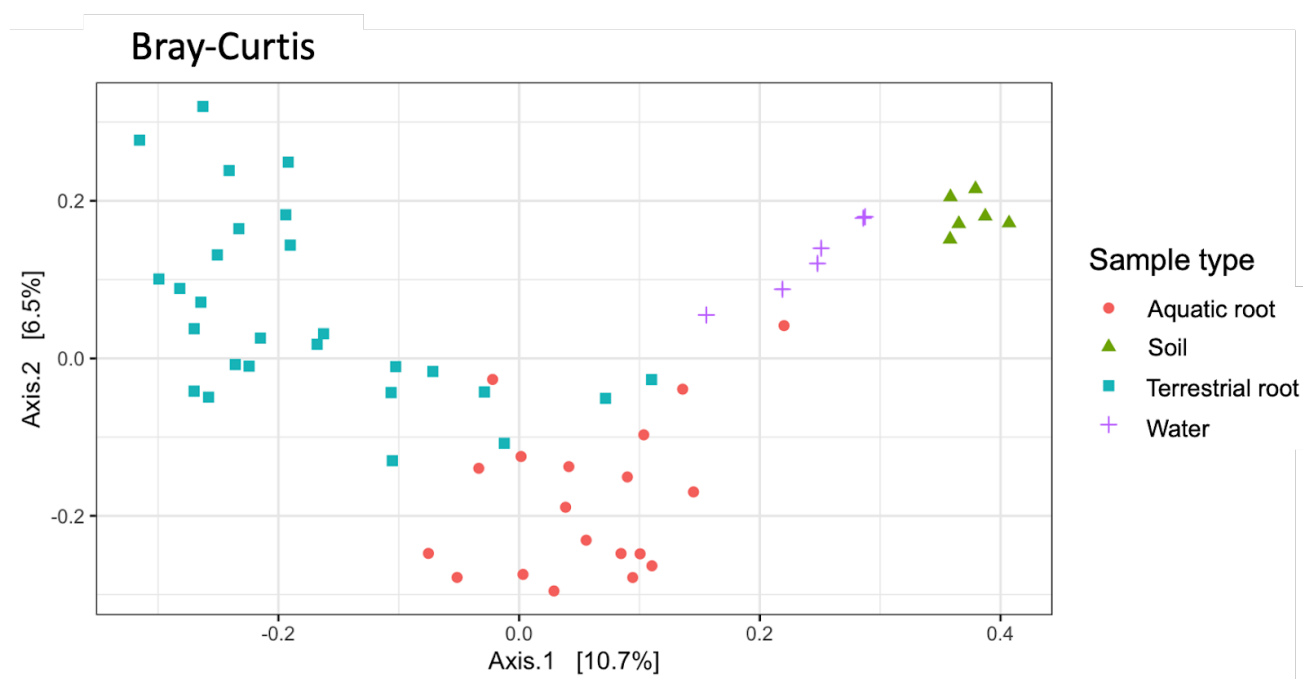

**Supplementary Figure 2.** PCA based on Bray-Curtis dissimilarity index between tissue samples, water and soil samples.

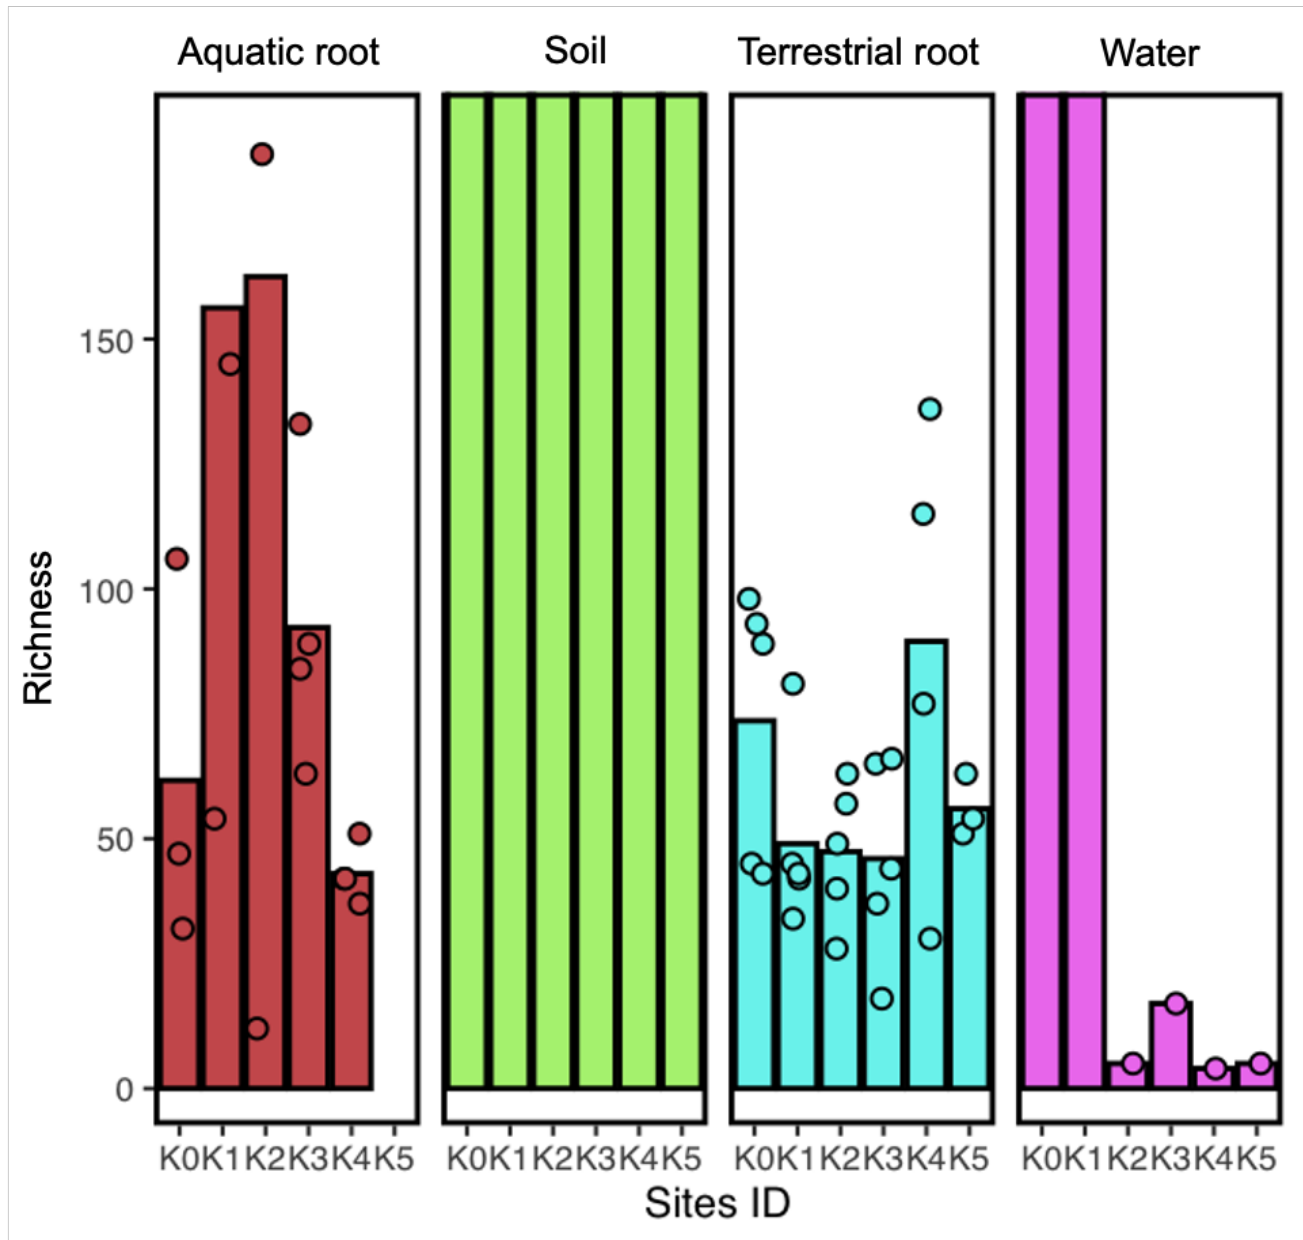

**Supplementary Figure 3.** Differences in diversity between ecosystem compartments, soil, water, and plant tissues.
